# Supplementary material for: Pathways to a cancer-free future: a protocol for modelled evaluations to minimise the future burden of colorectal cancer in Australia
Source: PubMed Central journal article supplement — BMJ Open. 2020 Jun 21;10(6):e036475. doi: 10.1136/bmjopen-2019-036475 (PMC7307542; doi:10.1136/bmjopen-2019-036475), 2020-06-21
Supplement: bmjopen-2019-036475.draft_revisions.pdf [file bmjopen-2019-036475.draft_revisions.pdf]

# BMJ Open

BMJ Open is committed to open peer review. As part of this commitment we make the peer review history of every article we publish publicly available.

When an article is published we post the peer reviewers' comments and the authors' responses online. We also post the versions of the paper that were used during peer review. These are the versions that the peer review comments apply to.

The versions of the paper that follow are the versions that were submitted during the peer review process. They are not the versions of record or the final published versions. They should not be cited or distributed as the published version of this manuscript.

BMJ Open is an open access journal and the full, final, typeset and author-corrected version of record of the manuscript is available on our site with no access controls, subscription charges or pay-per-view fees (<http://bmjopen.bmj.com>).

If you have any questions on BMJ Open's open peer review process please email [info.bmjopen@bmj.com](mailto:info.bmjopen@bmj.com)

# BMJ Open

## Pathways to a Cancer-Free Future: a protocol for modelled evaluations to minimise the future burden of colorectal cancer in Australia.

|                               |                                                                                                                                                                                                                                                                                                                                                                                                                                                                                                                                                                                                                                                                                                                                                                                                                                                                                                                                                                                                                                                                                                                                                                                                                                                                                                                                                                                                                                                                                                                                                                                                                                                                                                                                                                                                                                                                                                                                                                                                                                                                                                                                                                                                                                                                                                                                                                                         |
|-------------------------------|-----------------------------------------------------------------------------------------------------------------------------------------------------------------------------------------------------------------------------------------------------------------------------------------------------------------------------------------------------------------------------------------------------------------------------------------------------------------------------------------------------------------------------------------------------------------------------------------------------------------------------------------------------------------------------------------------------------------------------------------------------------------------------------------------------------------------------------------------------------------------------------------------------------------------------------------------------------------------------------------------------------------------------------------------------------------------------------------------------------------------------------------------------------------------------------------------------------------------------------------------------------------------------------------------------------------------------------------------------------------------------------------------------------------------------------------------------------------------------------------------------------------------------------------------------------------------------------------------------------------------------------------------------------------------------------------------------------------------------------------------------------------------------------------------------------------------------------------------------------------------------------------------------------------------------------------------------------------------------------------------------------------------------------------------------------------------------------------------------------------------------------------------------------------------------------------------------------------------------------------------------------------------------------------------------------------------------------------------------------------------------------------|
| Journal:                      | <i>BMJ Open</i>                                                                                                                                                                                                                                                                                                                                                                                                                                                                                                                                                                                                                                                                                                                                                                                                                                                                                                                                                                                                                                                                                                                                                                                                                                                                                                                                                                                                                                                                                                                                                                                                                                                                                                                                                                                                                                                                                                                                                                                                                                                                                                                                                                                                                                                                                                                                                                         |
| Manuscript ID                 | bmjopen-2019-036475                                                                                                                                                                                                                                                                                                                                                                                                                                                                                                                                                                                                                                                                                                                                                                                                                                                                                                                                                                                                                                                                                                                                                                                                                                                                                                                                                                                                                                                                                                                                                                                                                                                                                                                                                                                                                                                                                                                                                                                                                                                                                                                                                                                                                                                                                                                                                                     |
| Article Type:                 | Protocol                                                                                                                                                                                                                                                                                                                                                                                                                                                                                                                                                                                                                                                                                                                                                                                                                                                                                                                                                                                                                                                                                                                                                                                                                                                                                                                                                                                                                                                                                                                                                                                                                                                                                                                                                                                                                                                                                                                                                                                                                                                                                                                                                                                                                                                                                                                                                                                |
| Date Submitted by the Author: | 17-Dec-2019                                                                                                                                                                                                                                                                                                                                                                                                                                                                                                                                                                                                                                                                                                                                                                                                                                                                                                                                                                                                                                                                                                                                                                                                                                                                                                                                                                                                                                                                                                                                                                                                                                                                                                                                                                                                                                                                                                                                                                                                                                                                                                                                                                                                                                                                                                                                                                             |
| Complete List of Authors:     | <p>Feletto, E; Cancer Research Division, Cancer Council NSW; The University of Sydney, School of Public Health</p> <p>Lew, Jie Bin; Cancer Council New South Wales, Cancer Research Division; The University of Sydney, School of Public Health</p> <p>Worthington, Joachim; Cancer Council New South Wales, Cancer Research Division; The University of Sydney, School of Public Health</p> <p>He, Emily; Cancer Council New South Wales, Cancer Research Division; The University of Sydney, School of Public Health</p> <p>Caruana, Michael; Cancer Council New South Wales, Cancer Research Division; The University of Sydney, School of Public Health</p> <p>Butler, Katherine; Cancer Research Division, Cancer Council NSW</p> <p>Hui, Harriet; Cancer Research Division, Cancer Council NSW</p> <p>Taylor, Natalie; Cancer Council, Cancer Research Division; The University of Sydney, Faculty of Medicine and Health</p> <p>Banks, Emily; Australian National University, ANU College of Medicine, Biology and Environment</p> <p>Barclay, Karen; The University of Melbourne, Northern Clinical School, Melbourne Medical School</p> <p>Broun, Kate; The Cancer Council Victoria, Centre for Behavioural Research in Cancer</p> <p>Butt, Alison; University of New South Wales, Research Strategy Office</p> <p>Carter, Rob; Deakin University, Deakin Institute for Health Research</p> <p>Cuff, Jeff; University of New South Wales, Faculty of Science Biotech &amp; Biomolecular Science; Consumer representative, Research and Consumer Advocate</p> <p>Dessaix, Anita; Cancer Council New South Wales, Cancer Prevention and Advocacy</p> <p>Ee, Hooi; Sir Charles Gairdner Hospital, Department of Gastroenterology</p> <p>Emery, Jon; University of Melbourne, General Practice and Primary Care Academic Centre</p> <p>Frayling, Ian; Cardiff University,</p> <p>Grogan, Paul; Cancer Council New South Wales, Cancer Research Division; The University of Sydney, School of Public Health</p> <p>Holden, Carol; South Australian Health and Medical Research Institute, No Australians Dying of Bowel Cancer Initiative</p> <p>Horn, Christopher; Cancer Institute New South Wales</p> <p>Jenkins, Mark; The University of Melbourne, Centre for Epidemiology and Biostatistics</p> <p>Kench, James ; Royal Prince Alfred Hospital; The University of Sydney,</p> |

|           |                                                                                                                                                                                                                                                                                                                                                                                                                                                                                                                                                                                                                                                                                                                                                                                                                                                                                                                                                                                                                                                                                                                                                                                                                                                                                                                                                                                                                                                                                                                                                                                                                                                                                                                                                                                                                                                                                                                            |
|-----------|----------------------------------------------------------------------------------------------------------------------------------------------------------------------------------------------------------------------------------------------------------------------------------------------------------------------------------------------------------------------------------------------------------------------------------------------------------------------------------------------------------------------------------------------------------------------------------------------------------------------------------------------------------------------------------------------------------------------------------------------------------------------------------------------------------------------------------------------------------------------------------------------------------------------------------------------------------------------------------------------------------------------------------------------------------------------------------------------------------------------------------------------------------------------------------------------------------------------------------------------------------------------------------------------------------------------------------------------------------------------------------------------------------------------------------------------------------------------------------------------------------------------------------------------------------------------------------------------------------------------------------------------------------------------------------------------------------------------------------------------------------------------------------------------------------------------------------------------------------------------------------------------------------------------------|
|           | <p>Faculty of Medicine and Health<br/>         Laaksonen, Maarit; University of New South Wales, Centre for Big Data Research in Health<br/>         Leggett, Barbara; QIMR Berghofer Medical Research Institute<br/>         Mitchell, Gillian; Peter MacCallum Cancer Institute, Parkville Familial Cancer Centre; University of Melbourne, The Sir Peter MacCallum Department of Oncology<br/>         Morris, Susan; Consumer representative, Research and Consumer Advocate; Lynch Syndrome Australia<br/>         Parkinson, B; Macquarie University, Macquarie University Centre for the Health Economy<br/>         St John, D James; The Cancer Council Victoria; The University of Melbourne, Department of Medicine, The Royal Melbourne Hospital<br/>         Taoube, Linda; The University of Sydney, School of Public Health<br/>         Tucker, Katherine; Prince of Wales Hospital, Hereditary Cancer Centre; University of New South Wales, Prince of Wales Clinical School<br/>         Wakefield, Melanie ; Cancer Council Victoria, Centre for Behavioural Research in Cancer<br/>         Ward, Robyn; University of Sydney, Faculty of Medicine and Health<br/>         Win, Aung; The University of Melbourne, Centre for Epidemiology and Biostatistics; Victorian Comprehensive Cancer Centre, Precision Prevention and Early Detection, University of Melbourne Centre for Cancer Research<br/>         Worthley, Dan; South Australian Health and Medical Research Institute, Gastrointestinal Cancer Biology<br/>         Armstrong, Bruce; The University of Sydney, School of Public Health<br/>         Macrae, Finlay; Royal Melbourne Hospital, Genetics; The University of Melbourne, Department of Medicine, The Royal Melbourne Hospital<br/>         Canfell, Karen; Cancer Council New South Wales, Cancer Research Division; The University of Sydney, School of Public Health</p> |
| Keywords: | Gastrointestinal tumours < ONCOLOGY, PUBLIC HEALTH, HEALTH ECONOMICS                                                                                                                                                                                                                                                                                                                                                                                                                                                                                                                                                                                                                                                                                                                                                                                                                                                                                                                                                                                                                                                                                                                                                                                                                                                                                                                                                                                                                                                                                                                                                                                                                                                                                                                                                                                                                                                       |
|           |                                                                                                                                                                                                                                                                                                                                                                                                                                                                                                                                                                                                                                                                                                                                                                                                                                                                                                                                                                                                                                                                                                                                                                                                                                                                                                                                                                                                                                                                                                                                                                                                                                                                                                                                                                                                                                                                                                                            |

SCHOLARONE™  
 Manuscripts

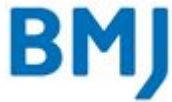

I, the Submitting Author has the right to grant and does grant on behalf of all authors of the Work (as defined in the below author licence), an exclusive licence and/or a non-exclusive licence for contributions from authors who are: i) UK Crown employees; ii) where BMJ has agreed a CC-BY licence shall apply, and/or iii) in accordance with the terms applicable for US Federal Government officers or employees acting as part of their official duties; on a worldwide, perpetual, irrevocable, royalty-free basis to BMJ Publishing Group Ltd ("BMJ") its licensees and where the relevant Journal is co-owned by BMJ to the co-owners of the Journal, to publish the Work in this journal and any other BMJ products and to exploit all rights, as set out in our [licence](#).

The Submitting Author accepts and understands that any supply made under these terms is made by BMJ to the Submitting Author unless you are acting as an employee on behalf of your employer or a postgraduate student of an affiliated institution which is paying any applicable article publishing charge ("APC") for Open Access articles. Where the Submitting Author wishes to make the Work available on an Open Access basis (and intends to pay the relevant APC), the terms of reuse of such Open Access shall be governed by a Creative Commons licence – details of these licences and which [Creative Commons](#) licence will apply to this Work are set out in our licence referred to above.

Other than as permitted in any relevant BMJ Author's Self Archiving Policies, I confirm this Work has not been accepted for publication elsewhere, is not being considered for publication elsewhere and does not duplicate material already published. I confirm all authors consent to publication of this Work and authorise the granting of this licence.

## Pathways to a Cancer-Free Future: a protocol for modelled evaluations to minimise the future burden of colorectal cancer in Australia.

Eleonora Feletto<sup>1,2</sup>, Jie-Bin Lew<sup>1,2</sup>, Joachim Worthington<sup>1,2</sup>, Emily He<sup>1,2</sup>, Michael Caruana<sup>1</sup>, Katherine Butler<sup>1</sup>, Harriet Hui<sup>1</sup>, Natalie Taylor<sup>1,3</sup>, Emily Banks<sup>4</sup>, Karen Barclay<sup>5</sup>, Kate Broun<sup>6</sup>, Alison Butt<sup>7</sup>, Rob Carter<sup>8</sup>, Jeff Cuff<sup>9,10</sup>, Anita Dessaix<sup>1</sup>, Hooi Ee<sup>11</sup>, Jon Emery<sup>12</sup>, Ian M. Frayling<sup>13</sup>, Paul Grogan<sup>1,2</sup>, Carol Holden<sup>14</sup>, Christopher Horn<sup>15</sup>, Mark A. Jenkins<sup>16</sup>, James G Kench<sup>3,17</sup>, Maarit A. Laaksonen<sup>18</sup>, Barbara Leggett<sup>19</sup>, Gillian Mitchell<sup>20,21</sup>, Susan Morris<sup>9,22</sup>, Bonny Parkinson<sup>23</sup>, D James St John<sup>6,24</sup>, Linda Taoube<sup>2</sup>, Katherine Tucker<sup>25,26</sup>, Melanie Wakefield<sup>6</sup>, Robyn L Ward<sup>2</sup>, Aung Ko Win<sup>16,27,28</sup>, Daniel Worthley<sup>14</sup>, Bruce K Armstrong<sup>2</sup>, Finlay A Macrae<sup>24,28</sup>, Karen Canfell<sup>1,2,26</sup>

<sup>1</sup>Cancer Council NSW, Sydney, NSW, Australia

<sup>2</sup>School of Public Health, Sydney Medical School, University of Sydney, NSW, Australia

<sup>3</sup>Faculty of Medicine and Health, University of Sydney, Sydney, Australia

<sup>4</sup>National Centre for Epidemiology and Population Health, Australian National University, Canberra, ACT, Australia

<sup>5</sup>Northern Clinical School, University of Melbourne, Melbourne Medical School, VIC, Australia

<sup>6</sup>Cancer Council Victoria, Melbourne, VIC, Australia

<sup>7</sup>Research Strategy Office, University of New South Wales, Australia

<sup>8</sup>Deakin Health Economics, Institute for Health Transformation, Faculty of Health, Deakin University, Victoria, Australia

<sup>9</sup>Consumer representative- Research and Consumer Advocate

<sup>10</sup>Faculty of Science Biotech & Biomolecular Science, University of New South Wales

<sup>11</sup>Department of Gastroenterology, Sir Charles Gairdner Hospital, Nedlands, WA, Australia.

<sup>12</sup>Centre for Cancer Research and Department of General Practice, University of Melbourne.

<sup>13</sup>Inherited Tumour Syndromes Research Group, Division of Cancer & Genetics, Cardiff University, UK

<sup>14</sup>South Australian Health and Medical Research Institute, Adelaide, Australia

<sup>15</sup>Cancer Institute NSW

<sup>16</sup>Centre for Epidemiology and Biostatistics, Melbourne School of Population and Global Health University of Melbourne, Australia

<sup>17</sup>Department of Tissue Pathology & Diagnostic Oncology, Royal Prince Alfred Hospital, Sydney, Australia

<sup>18</sup>Centre for Big Data Research in Health, University of New South Wales, Australia

<sup>19</sup>QIMR Berghofer Medical Research Institute, Queensland, Australia

<sup>20</sup>Familial Cancer Centre, Peter MacCallum Cancer Centre, Melbourne VIC Australia

<sup>21</sup>Sir Peter MacCallum Dept of Oncology, University of Melbourne, Melbourne, VIC Australia

<sup>22</sup>Lynch Syndrome Australia, Queensland, Australia

<sup>23</sup>Macquarie University Centre for the Health Economy, Macquarie University, NSW, Australia

<sup>24</sup>Department of Medicine, The Royal Melbourne Hospital, The University of Melbourne, VIC, Australia

<sup>25</sup>Hereditary Cancer Centre, Prince of Wales Hospital, Randwick, New South Wales, Australia

<sup>26</sup>Prince of Wales Clinical School, The University of New South Wales, Australia

<sup>27</sup>Precision Prevention and Early Detection, University of Melbourne Centre for Cancer Research, Victorian Comprehensive Cancer Centre, Victoria, Australia

<sup>28</sup>Genetic Medicine, Royal Melbourne Hospital, Parkville, Victoria, Australia

Corresponding author: Eleonora Feletto, Cancer Council NSW, 153 Dowling St, Woolloomooloo, NSW 2015 Australia email: [eleonoraf@nswcc.org.au](mailto:eleonoraf@nswcc.org.au)

Keywords: colorectal cancer, prevention, early detection, screening

## Abstract

### Introduction

With almost 50% of cases preventable and the Australian National Bowel Cancer Screening Program in place, colorectal cancer (CRC) is a prime candidate for investment to reduce burden. The challenge is determining the most effective ways to reduce morbidity and mortality. *Pathways-Bowel* is a multi-stage program that aims to identify best-value investment in CRC control by integrating: expert and end-user engagement; relevant evidence; modelled interventions to guide future research investment; and policy-driven implementation of interventions.

### Methods and analysis

*Pathways-Bowel* is an iterative work program that incorporates a calibrated and validated CRC natural history model for Australia (*Policy1-Bowel*) and assesses the health and cost outcomes and resource use of targeted interventions. Experts help identify and prioritise modelled evaluations of changing trends and interventions and critically assess results to advise on their real-world applicability. Where appropriate the results are used to support public policy change and make the case for optimal investment in specific CRC control interventions. Fourteen high priority evaluations have been modelled or planned, including evaluations of CRC outcomes from: changing the prevalence of modifiable exposures including smoking and body fatness; potential benefits of daily aspirin intake as a form of chemoprevention; increasing CRC incidence in people under 50 years; increasing screening participation in the general population and in Aboriginal and Torres Strait Islander peoples; alternative screening technologies and modalities; and changes to follow-up surveillance protocols. *Pathways-Bowel* is a unique, comprehensive approach to evaluating CRC control; no prior body of work has assessed the relative benefits of a wide variety of interventions across CRC development and progression to produce a list of best-value investments.

### Ethics and dissemination

Ethics approval was not required as human subjects were not involved. Findings are reported in a series of papers in peer-reviewed journals and presented at fora to engage the community and policymakers.

### Article summary

#### Strengths and limitations

- *Pathways-Bowel* leverages a fully calibrated natural history microsimulation model for CRC (*Policy1-Bowel*) to model evaluations of existing and hypothetical changing trends and interventions to improve CRC outcomes for Australians.

- This program aims to bridge the gap between end-user priorities, epidemiological and statistical research outputs and practical applicability from health, resource, and health system cost perspectives.
- Findings from the *Pathways-Bowel* program are applicable to Australia; however, the flexibility of *Policy1-Bowel* enables its future adaptation to other settings where location-specific data are available.
- The predictive modelling used is limited by and dependent on the available data sources and assumptions made in the absence of real-world data.
- The overarching *Pathways* program generates evidence on the best-value investments or “best buys” in cancer control across multiple cancers, to inform future decision making.

Word count:

- Abstract: 300
- Body: 3898

## Introduction

### *Background*

In Australia, colorectal cancer (CRC) was the third most commonly diagnosed cancer in 2017, with estimated incidence of 63.4 per 100,000 and 45.8 per 100,000 in males and females, respectively (1,2). A small proportion of CRC cases are found in higher-risk patients and associated with strong family history of CRC or hereditary syndromes. Lynch syndrome and Familial Adenomatous Polyposis account for ~3% and less than 1% of new CRC cases, respectively (3–5). The Australian Burden of Disease Study found there were over 95,000 years of healthy life lost due to CRC in 2015 which accounted for 2% of the total disease burden in Australia (6). From 1982 to 2015, CRC incidence and mortality rates decreased (from 58.3 to 57.4 and 32.3 to 19.2 per 100,000, respectively) (7), with noted gender, socio-economic and geographic disparities (8–11). The 5-year overall survival for CRC in Australia has increased from 51% in 1985–1989 to 70% in 2010–2014 (12). However, a recent analysis highlighted increasing CRC incidence in people under 50 years of age, which could be partially attributed to the rising prevalence of harmful risk factors but certain causes are still unknown (13). Nearly half (49.8%) of new CRC cases in Australia are attributable to known modifiable risk factors (14) and therefore could be influenced by primary prevention interventions. Evidence on policies and interventions for preventing bowel cancer through lifestyle change varies widely between risk factors. On current evidence, the best buy in CRC control is increasing participation in Australia’s National Bowel Cancer Screening Program (NBCSP) but fewer than half the eligible population choose to participate. By the 2020, all Australians aged 50–74 will be invited to participate in biennial screening using an immunochemical faecal occult blood test (iFOBT) (12). Further decreases in incidence and mortality of 23% and 36%, respectively, are anticipated by 2040 at current participation rates once full NBCSP implementation is in place (15).

### *Pathways*

In view of the changing landscape of CRC control, “*Pathways to a cancer-free future*” (*‘Pathways’*) was developed to focus investment where the biggest impact can be made at a population level. First described in relation to cervical cancer, it has since grown (16). The *Pathways* model is being applied to five major cancers: cervical, lung, colorectal, prostate, and breast cancer, and to cancers relating to Lynch syndrome with early work commencing in cancers of the ovary, liver and melanoma. It aims to identify the best-value investments, or “best buys”, in cancer control to inform future assessments by decision makers. *Pathways-Bowel* refers to the program of work focused on CRC, with a detailed assessment of high-risk individuals with Lynch syndrome and other Lynch-related cancers currently underway (17), as part of *Pathways-Lynch*. *Pathways-Bowel* will span the



1  
2  
3 CRC control continuum, from primary prevention to survivorship. It aims to model comparative  
4 evaluations of CRC interventions guided by the best available evidence. The results are intended to  
5 guide and underpin future research investment and policy implementation. **The aim of the current**  
6 **article is to outline the design and objectives of *Pathways*-Bowel and summarise the protocol for**  
7 **ongoing and planned modelled evaluations of CRC interventions.**  
8  
9  
10  
11  
12

## 13 **Methods and Analysis**

### 14 *Study design*

15  
16 *Pathways* as an overarching program has been previously described (16). Since that time, *Pathways*  
17 has transformed from a staged approach into a more iterative process. As evaluation results become  
18 available, they are immediately reviewed and disseminated as appropriate to support potential  
19 policy change.  
20  
21  
22  
23

### 24 *Patient and Public Involvement Statement*

25  
26 Multisectoral stakeholder involvement in *Pathways*-Bowel is achieved via a multidisciplinary  
27 Scientific Advisory Committee (SAC) including academics, clinicians, consumers and advisers on  
28 policy. The SAC was formed to ensure that there was involvement from all relevant stakeholders  
29 outside the core research team and confirm the relevance of modelled evaluations and their  
30 translation. The SAC was first convened to discuss CRC in March 2018 and members are consulted  
31 based on their area of expertise to guide, critique and support the program and its  
32 recommendations. Following critical assessment of the evidence, the SAC and smaller working  
33 groups provide guidance on modelled evaluations, ensuring there is involvement from interested  
34 parties throughout the process.  
35  
36  
37  
38  
39  
40  
41  
42  
43

### 44 *Processes and analysis for modelled evaluations of interventions*

#### 45 Modelling platform: *Policy1-Bowel*

46  
47 We use a previously developed microsimulation model platform, *Policy-1 Bowel*, to perform  
48 predictive modelled evaluations of CRC interventions in Australia (18). The platform has, thus far,  
49 been developed to evaluate the NBCSP (15,19,20). The model platform is implemented in C++ and  
50 includes several interconnected elements to evaluate the NBCSP (see Figure 1):  
51  
52

- 53 a) a model of the development of CRC from adenoma (via the adenoma-carcinoma pathway)  
54 and sessile serrated lesions (via the serrated pathways) and survival from CRC;  
55  
56  
57  
58  
59  
60

- 1  
2  
3 b) a model of screening for average-risk people, including post-screening diagnosis, treatment,  
4 and surveillance (Figure 2 summarises the current NBCSP screening delivery pathways  
5 incorporated in *Policy1-Bowel*);  
6  
7  
8 c) a multiple-cohort implementation model that simulates the development of polyps and CRC,  
9 screening, diagnosis and other downstream NBCSP processes in the target population over a  
10 time period of interest; and  
11  
12  
13 d) a population component that applies Australian-specific demographic, economic and health  
14 utilities data (including cost and quality-adjusted life-years) to the model outputs to estimate  
15 cross-sectional results in a population.  
16  
17  
18  
19

### *Policy1-Bowel* validation

20  
21 Extensive calibration of the model has been carried out against a wide range of current NBCSP  
22 outputs and other Australian data sources (15). The model has also been validated against the  
23 findings of other well-established microsimulation models and multiple large randomised-controlled  
24 trials with long-term follow-up (21). Further details of the model used in this work, and descriptions  
25 of its development, parameterisation, data sources, calibration, and validation outcomes, have been  
26 published previously and technical appendices are available (15,18–20).  
27  
28  
29  
30  
31  
32

### Economic Analysis

33  
34 The modelled evaluations are conducted and result in economic analyses to develop a business case  
35 for investment. *Pathways-Bowel* (and all *Pathways*) uses a common framework so “best buys” can  
36 be compared within and between groups. The framework is in development and will be based on  
37 similar initiatives internationally (22). The populations of interest are average-risk Australians and  
38 sub-groups relevant to the modelled evaluations. For each evaluation, several primary outcomes are  
39 considered, including:  
40  
41  
42  
43  
44

- 45 i) health benefits– e.g. reduction in lifetime risk of CRC incidence and mortality;  
46  
47 ii) harms – e.g. hospitalisations, adverse events of colonoscopy;  
48  
49 iii) resource use – e.g. communications strategies to promote interventions, workforce,  
50 screening and diagnostic tests; and  
51  
52 iv) health-economic outcomes – e.g. discounted and undiscounted lifetime cost, life-years,  
53 quality-adjusted-life years, disability-adjusted life years and incremental cost-effectiveness  
54 ratio (ICER).  
55  
56

57 For each intervention, the primary outcomes listed may be expanded or differ. The comparator for  
58 analyses is the general population or specific sub-group of interest without the influence of the  
59  
60

1  
2  
3 intervention being assessed. The potential harms associated with interventions are oftentimes  
4 minimal, but *Pathways* will enable their characterisation and quantification. For example, the health  
5 benefits and harms for screening would also include colonoscopy-related adverse events and  
6 number-needed-to colonoscope per CRC death prevented.  
7  
8  
9

10  
11 A health services perspective is applied, and efforts be made to expand to the societal perspective  
12 including characterisation of out-of-pocket expenses. From a health services perspective, costs  
13 incurred by governments and the health system over a person's lifetime (until the age of 89 years)  
14 are incorporated. For each evaluation, multiple time horizons may be chosen as appropriate to the  
15 specific intervention, but the common time horizon is to 2050 (as this timeline indicates a change  
16 within a generation). In terms of an indicative willingness-to-pay (WTP) threshold, \$30,000-  
17 50,000/life-year saved has previously been used for evaluations of interventions for CRC and cervical  
18 cancer (19,23,24). In *Pathways*, a 5% discount rate and the indicative WTP threshold of \$30,000-  
19 50,000/life-year saved, with alternative WTP thresholds included for comparability, are used. Our  
20 focus is to quantify and comparing ICERs in all our analyses. One-way and probabilistic sensitivity  
21 analyses and uncertainty analyses will be conducted as required to assess the impact of model  
22 parameter uncertainties on the key model findings.  
23  
24  
25  
26  
27  
28  
29  
30  
31  
32

### 33 Rationale for modelled evaluations of CRC interventions

34 Under the guidance of the SAC, a list of priority modelled evaluations for CRC interventions was  
35 compiled. Evaluations were preceded by exploratory scoping reviews of the literature to identify  
36 potential interventions and were escalated to a full systematic review as required and determined  
37 by the SAC. The ongoing and planned interventions are listed in Table 1 and vary based on the CRC  
38 control continuum and the evidence available. These represent the first series of evaluations.  
39 Broadly, these evaluations cover interventions to reduce CRC risk, interventions in light of changing  
40 incidence trends, modifications to the NBCSP via target age groups, increased participation and  
41 alternative screening methods, and improved surveillance management. Findings from these  
42 analyses have been and will continue to be reviewed by the SAC as required. At a later date, these  
43 evaluations will grow and could include topics of growing public interest, for example the promotion  
44 of healthy diet, and extend to the later stages of CRC control as evidence becomes available.  
45  
46  
47  
48  
49  
50  
51  
52  
53  
54

55 While *Policy1-Bowel* has been developed to run modelled evaluations of the NBCSP, it is a flexible  
56 and dynamic model that can be adapted to incorporate both alternative screening interventions as  
57 well as interventions addressing other stages of the CRC continuum. *Policy1-Bowel* proves a critical  
58  
59  
60

1  
2  
3 tool for assessing the “best buys” for CRC. The section below outlines how *Pathways-Bowel* is being  
4 used in the contexts of primary prevention, screening and early detection and treatment for CRC.  
5  
6  
7

#### 8 Primary Prevention: Reducing risk

9  
10 Promoting healthy behaviours and reducing risk through primary prevention can play an important  
11 role in CRC control (14). Targeted primary prevention interventions to reduce CRC risk could address  
12 any or all of the following: tobacco use, alcohol use, body fatness, insufficient physical activity,  
13 insufficient dietary fibre intake, and excess red and processed meat intake (25–27). The prevalence  
14 of most of these risk factors, except tobacco use, has increased in Australians in recent decades but  
15 for some key risk factors, such as overweight and obesity, prevalence in children is rising and calls for  
16 action are increasing (28). Although evidence is less robust, the use of calcium supplements,  
17 consumption of dairy products and wholegrains, and use of hormone therapy by postmenopausal  
18 women have been identified as potentially reducing CRC risk (25,29,30). Notably, the 2017  
19 Australian clinical practice guidelines for CRC recommend low-dose daily aspirin use for all people  
20 aged 50–70 as evidence suggests its potential effectiveness in CRC primary prevention (29,30). More  
21 recent studies have begun exploring the role of the gut microbiota in the development of CRC, which  
22 can be indirectly affected by diet (31). In practice, evidence-based interventions addressing these  
23 risk factors are challenging to evaluate without information on medium to long term CRC outcomes.  
24  
25 *Pathways-Bowel* will synthesise the existing evidence to determine the likely impact on CRC  
26 outcomes in the future. Initially, the priorities in this area (Table 1) are: (1) changing smoking  
27 prevalence, (2) changing body fatness prevalence and distribution, and (3) impact of daily aspirin  
28 prophylaxis. Other behaviours, such as alcohol consumption and diet, will potentially be added at a  
29 later stage.  
30  
31  
32  
33  
34  
35  
36  
37  
38  
39  
40  
41  
42  
43

#### 44 Screening and Early Detection: NBCSP outcomes

45 Identification and removal of precancerous adenomas can prevent CRC development, and early  
46 detection of existing malignancies improves survival, making CRC an ideal candidate for an organised  
47 population screening program (32). The NBCSP participation rate over the 2016-2017 biennial period  
48 was about 40% nationally (12). Current reported rates of colonoscopy for assessment of individuals  
49 with a positive NBCSP-iFOBT test are approximately 66%, with known underreporting (12).  
50  
51 Recommended screening for people at intermediate or high CRC risk due to family history of CRC  
52 and/or hereditary syndromes is more intense, beginning at a younger age, and might include iFOBT  
53 and colonoscopy screening depending on level of risk, informed by evidence (33). In addition,  
54 ongoing surveillance of individuals with either a positive iFOBT or polyps removed at colonoscopy  
55  
56  
57  
58  
59  
60

1  
2  
3 follow varying management recommendations based on level of risk and subsequent colonoscopy  
4 results (34).  
5  
6  
7

8 National reports issued by the Australian Institute of Health and Welfare, along with other studies,  
9 have drawn attention to NBCSP participation disparities by gender, geographic location, Indigenous  
10 status, place of birth and language spoken at home (12,35–37). Interventions to promote CRC  
11 screening, used internationally, revolve largely around general population awareness and health  
12 organisation or practitioner endorsement of participation and follow-up (38–40). Efforts are now  
13 being made by government and not-for-profit organisations to improve NBCSP participation both in  
14 the general population and in targeted population subgroups (41–43). Interventions to improve  
15 NBCSP participation are likely to be effective and cost-effective investments to improve NBCSP and  
16 health outcomes (41,42). Evaluations of interventions to support compliance with recommendations  
17 for screening, follow-up and surveillance and to assess the best use of existing health resources  
18 could also be conducted, when data on the performance of these interventions are available.  
19  
20  
21  
22  
23  
24  
25  
26  
27

28 Australia has a national organised screening program (federally funded and near full  
29 implementation) that should be taken into account in any modelled evaluation. The priority areas  
30 cover predictive modelling of the NBCSP outcomes under a range of conditions or changes in the  
31 external environment or program (Table 1). These scenarios are: (1) changing temporal incidence  
32 trends, (2) targeting NBCSP participation in population subgroups, (3) targeting NBCSP participation  
33 to a broader age range, (4) long-term NBCSP participation at varying rates, (5) long-term NBCSP  
34 participation increased by simulated mass-media campaigns, (6) using alternative technologies, and  
35 (7) modifying surveillance management.  
36  
37  
38  
39  
40  
41  
42  
43

#### 44 Treatment

45 Once diagnosed, surgery is generally considered as initial treatment, with or without adjuvant  
46 chemotherapy or radiation therapy (44,45). The goal of surgery is to remove any tumour as well as  
47 surrounding tissue either laparoscopically or via traditional open surgery (46). Variations in  
48 treatment pathways more often relate to adjuvant chemotherapy where there are differences in  
49 guidelines and outcomes based on stage, location and genetic mutations, where relevant.  
50 Additionally, post-operative complications can occur and impact individuals (47). Metastatic disease  
51 is treated with systemic chemotherapy and biological therapies. Bevacizumab, added to the  
52 Pharmaceutical Benefit Schedule (PBS) for Australian Government supported subsidies in 2009, can  
53 be used in addition to chemotherapy in metastatic CRC cases and has been found to prolong both  
54  
55  
56  
57  
58  
59  
60

1  
2  
3 progression-free survival (from 7.1 to 9.7 months) as well as overall survival (from 17.7 to 20.5  
4 months) in first- and second-line therapy (48). Cetuximab and panitumumab are also PBS-subsidised  
5 for use in patients with RAS wild-type CRC (49). Besides these, there have been few modifications to  
6 the PBS related directly to therapies for CRC. For CRC, immunotherapy has proven effective in early  
7 and advanced microsatellite unstable CRC tumours, which can comprise 15% of all CRC and greater  
8 for those under 50 years. Research continues in this area with an active interest in the concept of  
9 personalised medicine with therapies for specific CRC subtypes (50). There have been calls for  
10 further research into several new immune agents and other therapies for CRC treatment that could  
11 potentially change patient outcomes. In future, evaluations of treatment options and their  
12 associated outcomes (including post-operative complications) can be conducted as part of  
13 *Pathways-Bowel* to determine both the therapeutic- and cost-effectiveness of existing and novel  
14 therapies as further evidence becomes available in Australia.

### Survivorship

25  
26 With a 5-year overall survival (2010–2014) of 70% and decline in mortality predicted to continue  
27 (12), survivorship issues are growing in relevance and importance. The majority of evidence is  
28 focused on patient surveillance for recurrence with differences across available guidelines on the  
29 frequency and timing of follow-up tests (51). Survivorship issues for CRC patients include physical,  
30 psychological and social challenges as well as ongoing healthcare needs (51–54). Australian evidence  
31 has suggested care is highly variable in CRC survivors and disparities by socio-economic group are  
32 apparent (53). American guidelines for CRC survivorship have highlighted the role of risk-based  
33 health care and there has been a shift in focus to improving patient outcomes through survivorship  
34 care plans and coordinated care (51,52). In future, evaluations of survivorship issues and  
35 interventions to improve outcomes will be integrated into *Pathways-Bowel*.

### Ethics and dissemination

45  
46 The *Pathways-Bowel* protocol for modelled evaluations has been reviewed and approved by the  
47 SAC. No human subjects are involved to perform modelled evaluations and therefore Human  
48 Research Ethics Committee was not required. Where epidemiological analyses are planned and  
49 require ethics approval, it will be sought. No deviations from the protocol will be conducted without  
50 prior review and approval of the relevant working party leads from the SAC.

### Preliminary Results

1  
2  
3 This program formalises an existing ongoing body of research which has already produced outputs.  
4 *Pathways-Bowel* officially commenced in early 2017 and is an ongoing collaboration with the SAC  
5 and other CRC-specialist researchers. As results become available, they are reviewed and prepared  
6 for peer-reviewed publication. Work has initially focused on evaluating the NBCSP from various  
7 perspectives using both predictive modelling and epidemiological research (15,19,20,37,41). An  
8 evaluation of NBCSP effectiveness and cost-effectiveness at various participation levels showed that  
9 increasing participation from 40% to 60% would prevent 83,800 deaths from 2015-2040 and reduce  
10 annual expenditure on CRC control within a decade of full NBCSP rollout (15). We also explored the  
11 impact of optimistic NBCSP adherence rates, possibly beyond those achievable in practice, to  
12 determine whether the impact of such an intervention is substantial and worth pursuing further.  
13  
14  
15  
16  
17  
18  
19  
20

21 Alternative screening methods using different screening modalities or targeting NBCSP screening age  
22 groups have also been evaluated (19,20). The alternative technologies evaluated were plasma DNA  
23 testing, faecal DNA testing, computed tomography colonography, flexible sigmoidoscopy, and  
24 colonoscopy (20). Extensions to the target age range for the general population were also assessed,  
25 including people in their 40s and/or people in their 80s (19). Considering the health outcomes and  
26 cost-effectiveness, the studies concluded that the planned NBCSP using biennial iFOBT and targeting  
27 people aged 50-74 years is currently the optimal option for CRC screening in Australia, and achieving  
28 higher screening participation within that age range will save more lives and improve the long-term  
29 cost-effectiveness (19,20). These results had a direct impact on clinical practice and policy as they  
30 were used to inform the 2017 “Clinical practice guidelines for the prevention, early detection and  
31 management of colorectal cancer”, approved by the National Health and Medical Research Council,  
32 and guided recommendations for the NBCSP (30).  
33  
34  
35  
36  
37  
38  
39  
40  
41  
42

43 In addition to the planned modelled evaluations, epidemiological data will also be assessed to  
44 quantify and characterise screening occurring outside the NBCSP, which is anecdotally thought to be  
45 considerable and may impact the estimates of the benefits of increasing participation in NBCSP if  
46 these individuals are already being screened (55). Further work has been undertaken and continues  
47 to inform guidelines and policy in areas of CRC management, such as the updated national  
48 surveillance colonoscopy guidelines (34). As additional evidence accumulates for potential  
49 interventions, these will be explored in future modelled evaluations and used to inform guidelines  
50 and policy change discussions. Notably, the *Policy1-Bowel* platform was used to evaluate a recent  
51 pilot mass-media campaign aimed at increasing NBCSP participation which resulted in a \$10 million  
52 government investment in a national mass-media campaign (43). This provides a clear  
53  
54  
55  
56  
57  
58  
59  
60

1  
2  
3 demonstration on the usefulness of *Pathways*-Bowel in guiding investment and policy  
4 implementation (41–43).  
5  
6  
7

## 8 **Discussion**

9  
10 The proven ability and future capacity of the *Pathways* program to identify the best-value  
11 investments in cancer control is critical in public health decision making. Internationally it has been  
12 recognised that demonstrating the cost-effectiveness of public health interventions helps to  
13 underpin commitment from policymakers and funders (56). However, the varying methods by which  
14 interventions are evaluated makes them difficult to compare and subject to methodological  
15 confounding (56). *Pathways*-Bowel is leading by example. *Pathways*-Bowel is a unique, evidence-  
16 based, comprehensive approach to CRC control initially focused on screening interventions and their  
17 effectiveness in relation to the evolving knowledge of the natural history of CRC. Relevant evidence  
18 exists in CRC, but no prior body of work has assessed the relative benefits of interventions across the  
19 CRC spectrum in a systematic way using a health economics framework, producing “best buys” for  
20 the nation. By providing uniformly obtained, high quality evidence guided by a standardised  
21 framework which is in development, *Pathways*-Bowel has the capacity to drive CRC control change  
22 and improve outcomes for Australians across the entire spectrum of risk. *Pathways* is a way to  
23 assess the impact of many more interventions than could be subject to clinical trials; the  
24 interventions can even be complementary, provided they are anchored in the real world.  
25  
26  
27  
28  
29  
30  
31  
32  
33  
34  
35

36  
37 *Pathways*-Bowel engages and involves researchers, clinicians, consumers, policymakers and other  
38 key stakeholders from its outset and throughout the process. Findings are presented in such a way  
39 that stakeholders can use the information to guide policy change priorities, funding  
40 recommendations and evidence-based advocacy for improved outcomes. Early results are integrated  
41 with policy and advocacy efforts through local independent cancer control agencies with a track  
42 record in changing policy. The findings may also identify areas where further research could facilitate  
43 evaluations and guide research priority setting by funders.  
44  
45  
46  
47  
48  
49

50  
51 The type of predictive modelling used in the *Pathways* program is not without its limitations. It is  
52 dependent on the available data sources and assumptions made in the absence of robust data. In  
53 Australia we are fortunate to have high quality data available on CRC incidence and mortality and  
54 regular monitoring reports made publicly available on the performance of the NBCSP. These data  
55 have been used to develop a robust and sound *Policy1-Bowel* platform. Nevertheless, the modelled  
56 results remain predictions. It is through extensive validation with trial outcomes (21), continual  
57  
58  
59  
60



1  
2  
3 improvement of the model, and input of updated real world information as it becomes available,  
4 that the outputs are strengthened.  
5  
6  
7

8 In terms of health economics, the health services perspective is used which limits the interpretation  
9 of results. Economic modelling, by itself, does not explicitly aid policymakers to maximise equity.  
10 However, more broadly, the *Pathways*-Bowel program of research embeds equity as a pillar.  
11 Through *Pathways*, standard economic analyses are complemented by systematic predictive  
12 modelling for specific groups and issues. Although applicable to the Australian general population,  
13 the outcomes can be evaluated for other contexts where data are available. Aboriginal and Torres  
14 Strait Islander peoples, for example, have seen varying trends in CRC incidence and mortality over  
15 time when compared to the Australian population, with significant increase in incidence, no  
16 statistically significant trend in mortality, and a lower 5-year relative survival (58%) (57). Evaluations  
17 are being conducted for this population group to assess the impact of screening through the NBCSP  
18 from age 40 to 74, and modelling of sub-groups can be extended to culturally and linguistically  
19 diverse populations living in Australia as required. Overall, the flexibility of the modelling platform  
20 used in *Pathways*-Bowel allows for its application to other settings in the future, both for developed  
21 and developing countries, and this has already begun for China.  
22  
23  
24  
25  
26  
27  
28  
29  
30  
31  
32

33 While the current focus is on prevention and screening, *Pathways*-Bowel and the *Policy1-Bowel*  
34 platform have the flexibility to evaluate diagnosis, treatment and survivorship interventions as  
35 evidence is gathered. The capacity of the model is continually being extended and strengthened with  
36 each new modelled evaluation performed. There is much promise in current research to identify  
37 optimal approaches to population-based screening for CRC in Australia. The *Pathways* program has  
38 already been established based on sophisticated analysis of the associated benefits, harms, and cost  
39 factors. The next step, implementation of interventions and policies into practice, is crucial for  
40 ensuring the benefits of optimal approaches are realised by those who need it: the Australian  
41 population. Evidence-based approaches to inform “best buys” in policy reform, accounting for  
42 context, system complexity and stakeholder perspectives, is a fundamental prerequisite for  
43 successful and sustained translation of discoveries into real world settings. The *Pathways* program  
44 presents the opportunity to continually optimise evidence-based support for cancer control  
45 interventions.  
46  
47  
48  
49  
50  
51  
52  
53  
54  
55  
56  
57  
58  
59  
60

List of figures:

Figure 1: Schematic diagram of the *Policy1-Bowel* microsimulation model platform.

Figure 2: Modelled screening delivery pathway (based on NBCSP) modelled in the *Policy1-Bowel* microsimulation model platform.

**Table 1: Priority modelled evaluations for CRC interventions**

| Evaluation                                                                                                                                                                                   | Focus Area                                                                      | Status    |
|----------------------------------------------------------------------------------------------------------------------------------------------------------------------------------------------|---------------------------------------------------------------------------------|-----------|
| Impact* of changing smoking prevalence on CRC                                                                                                                                                | Reducing risk of CRC                                                            | Ongoing   |
| Impact* of changing body fatness prevalence and distribution on CRC                                                                                                                          | Reducing risk of CRC                                                            | Ongoing   |
| Impact* of daily aspirin prophylaxis on CRC                                                                                                                                                  | Reducing risk of CRC                                                            | Ongoing   |
| Impact* of NBCSP in the long term due to the increasing CRC incidence in younger cohorts                                                                                                     | NBCSP outcomes: Changing temporal trends                                        | Ongoing   |
| Impact* of extending the NBCSP to younger ages for birth cohorts with increasing CRC rate                                                                                                    | NBCSP outcomes: Changing temporal trends                                        | Ongoing   |
| Impact* of extending the NBCSP to people aged 40-49 years for the Aboriginal and Torres Strait Islander peoples                                                                              | NBCSP outcomes: Targeting population subgroups with different CRC risk profiles | Ongoing   |
| Impact* of extending the NBCSP to younger (40-49 years) and/or older (75-84 years) ages of average-risk Australians                                                                          | NBCSP outcomes: Targeting NBCSP participation to a broader age range            | Published |
| Impact* of the NBCSP at currently observed rates in the long term                                                                                                                            | NBCSP outcomes: Long-term NBCSP participation                                   | Published |
| Impact* of increasing NBCSP participation to 60 and 70%                                                                                                                                      | NBCSP outcomes: Increasing NBCSP participation rates                            | Published |
| Impact* of optimising NBCSP adherence (iFOBT screening and diagnostic assessment) to 90% and quantifying a maximum threshold for cost-effective investment towards improving NBCSP adherence | NBCSP outcomes: Increasing NBCSP participation rates                            | Complete  |
| Impact* of mass media campaigns aimed at increasing participation in NBCSP                                                                                                                   | NBCSP outcomes: Increasing NBCSP participation rates                            | Complete  |
| Impact* of including twice-off screening colonoscopies at age 40 and 60 in addition to the current NBCSP                                                                                     | NBCSP outcomes: Alternative screening methods                                   | Complete  |
| Impact* of 13 alternative screening approaches involving use of iFOBT, colonoscopy, sigmoidoscopy, computed tomographic colonography, faecal DNA, and plasma DNA for the NBCSP               | NBCSP outcomes: Alternative screening methods                                   | Published |
| Impact* of modifications to colonoscopic surveillance protocols, especially the newly ratified Australian colonoscopy surveillance guidelines to the previous guidelines                     | NBCSP outcomes: Modifying colonoscopic surveillance management                  | Ongoing   |

\*The impact of listed evaluations assessed in terms of health outcomes, resource use and costs.

Abbreviations: NBCSP: National Bowel Cancer Screening Program; CRC: Colorectal Cancer; iFOBT: immunochemical faecal occult blood test

## References

1. Australian Institute of Health and Welfare. Cancer in Australia 2019. Canberra: AIHW; 2019. Report No.: Cancer series no.119. Cat. no. CAN 123.
2. Australian Institute of Health and Welfare. Cancer in Australia: Actual incidence data from 1982 to 2013 and mortality data from 1982 to 2014 with projections to 2017. *Asia Pac J Clin Oncol*. 2018;14(1):5–15.
3. Lynch HT, Lynch PM, Lanspa SJ, Snyder CL, Lynch JF, Boland CR. Review of the Lynch syndrome: history, molecular genetics, screening, differential diagnosis, and medicolegal ramifications. *Clin Genet*. 2009 Jul;76(1):1–18.
4. Karstensen JG, Burisch J, Pommergaard H-C, Aalling L, Højen H, Jespersen N, et al. Colorectal Cancer in Individuals With Familial Adenomatous Polyposis, Based on Analysis of the Danish Polyposis Registry. *Clin Gastroenterol Hepatol*. 2019 Oct 1;17(11):2294-2300.e1.
5. Hampel H, Frankel WL, Martin E, Arnold M, Khanduja K, Kuebler P, et al. Feasibility of screening for Lynch syndrome among patients with colorectal cancer. *J Clin Oncol Off J Am Soc Clin Oncol*. 2008 Dec 10;26(35):5783–8.
6. Australian Institute of Health and Welfare. Australian Burden of Disease Study: impact and causes of illness and death in Australia 2015. Canberra: AIHW; 2019. Report No.: Australian Burden of Disease Study series no. 19. Cat. no. BOD 22.
7. Australian Institute of Health and Welfare. Australian Cancer Incidence and Mortality (ACIM) books [Internet]. 2019 [cited 2019 Jan 31]. Available from: <http://www.aihw.gov.au/acim-books/>
8. Yu XQ, O'Connell DL, Gibberd RW, Armstrong BK. A population-based study from New South Wales, Australia 1996-2001: area variation in survival from colorectal cancer. *Eur J Cancer Oxf Engl* 1990. 2005 Nov;41(17):2715–21.
9. Jong KE, Smith DP, Yu XQ, O'Connell DL, Goldstein D, Armstrong BK. Remoteness of residence and survival from cancer in New South Wales. *Med J Aust*. 2004 Jun 21;180(12):618–22.
10. Yu XQ, O'Connell DL, Gibberd RW, Armstrong BK. Assessing the impact of socio-economic status on cancer survival in New South Wales, Australia 1996-2001. *Cancer Causes Control CCC*. 2008 Dec;19(10):1383–90.
11. Stanbury JF, Baade PD, Yu Y, Yu XQ. Cancer survival in New South Wales, Australia: socioeconomic disparities remain despite overall improvements. *BMC Cancer*. 2016 Feb 1;16.
12. Australian Institute of Health and Welfare. National Bowel Cancer Screening Program: monitoring report 2019. Canberra: AIHW; 2019. Report No.: Cancer series no. 125. Cat. no. CAN 125.
13. Feletto E, Yu XQ, Lew J-B, St John DJB, Jenkins MA, Macrae FA, et al. Trends in colon and rectal cancer incidence in Australia from 1982 to 2014: Analysis of data on over 375,000 cases. *Cancer Epidemiol Biomarkers Prev*. 2019;28(1):83–90.
14. Whiteman DC, Webb PM, Green AC, Neale RE, Fritschi L, Bain CJ, et al. Cancers in Australia in 2010 attributable to modifiable factors: summary and conclusions. *Aust N Z J Public Health*. 2015 Oct 1;39(5):477–84.

15. Lew J-B, St John DJB, Xu X-M, Greuter MJE, Caruana M, Cenin DR, et al. Long-term evaluation of benefits, harms, and cost-effectiveness of the National Bowel Cancer Screening Program in Australia: a modelling study. *Lancet Public Health*. 2017 Jul 1;2(7):e331–40.
16. Velentzis LS, Smith MA, Simms KT, Lew J-B, Hall M, Hughes S, et al. Pathways to a cancer-free future: A protocol for modelled evaluations to maximize the future impact of interventions on cervical cancer in Australia. *Gynecol Oncol*. 2019 Jan 1;152(3):465–71.
17. Kang Y-J, Killen J, Caruana M, Simms K, Taylor N, Frayling IM, et al. The predicted impact and cost-effectiveness of systematic testing of people with incident colorectal cancer for Lynch syndrome. *Med J Aust [Internet]*. [cited 2019 Nov 21];n/a(n/a). Available from: <https://onlinelibrary.wiley.com/doi/abs/10.5694/mja2.50356>
18. Cancer Council NSW. Policy1 [Internet]. 2019 [cited 2019 Aug 21]. Available from: <http://www.policy1.org/models/bowel>
19. Lew J-B, St John DJB, Macrae FA, Emery JD, Ee HC, Jenkins MA, et al. Benefits, harms and costs of potential age-extensions to the National Bowel Cancer Screening Program in Australia. *Cancer Epidemiol Biomarkers Prev*. 2018;27(12):1450–61.
20. Lew J-B, St John DJB, Macrae FA, Emery JD, Ee HC, Jenkins MA, et al. Evaluation of the benefits, harms and cost-effectiveness of potential alternatives to iFOBT testing for colorectal cancer screening in Australia. *Int J Cancer*. 2018 Jul 15;143(2):269–82.
21. Lew J-B, Greuter MJE, Caruana M, He E, Worthington J, St John DJB, et al. Validation of microsimulation models against alternative model predictions and long-term colorectal cancer incidence and mortality outcomes of randomised-controlled trials. 2019;In Preparation.
22. Emerson J, Panzer A, Cohen JT, Chalkidou K, Teerawattananon Y, Sculpher M, et al. Adherence to the iDSI reference case among published cost-per-DALY averted studies. *PLOS ONE*. 2019 May 1;14(5):e0205633.
23. Simms KT, Laprise J-F, Smith MA, Lew J-B, Caruana M, Brisson M, et al. Cost-effectiveness of the next generation nonavalent human papillomavirus vaccine in the context of primary human papillomavirus screening in Australia: a comparative modelling analysis. *Lancet Public Health*. 2016 Dec 1;1(2):e66–75.
24. Lew J-B, Simms KT, Smith MA, Hall M, Kang Y-J, Xu XM, et al. Primary HPV testing versus cytology-based cervical screening in women in Australia vaccinated for HPV and unvaccinated: effectiveness and economic assessment for the National Cervical Screening Program. *Lancet Public Health*. 2017 Feb 1;2(2):e96–107.
25. World Cancer Research Fund / American Institute for Cancer Research. Continuous Update Project Report. Diet, Nutrition, Physical Activity, and Colorectal Cancer. World Cancer Research Fund; 2017.
26. IARC Working Group on the Evaluation of Carcinogenic Risks to Humans. IARC Monographs: Personal habits and indoor combustions. Vol. Volume 100E. A review of human carcinogens. Lyon: International Agency for Research on Cancer; 2012.
27. Lauby-Secretan B, Scoccianti C, Loomis D, Grosse Y, Bianchini F, Straif K. Body Fatness and Cancer — Viewpoint of the IARC Working Group. *N Engl J Med*. 2016 Aug 25;375(8):794–8.

- 1  
2  
3 28. Australian Institute of Health and Welfare. Risk factors contributing to chronic disease.  
4 Canberra: AIHW; 2012. Report No.: Cat No. PHE 157.  
5
- 6 29. Algra AM, Rothwell PM. Effects of regular aspirin on long-term cancer incidence and  
7 metastasis: a systematic comparison of evidence from observational studies versus randomised  
8 trials. *Lancet Oncol*. 2012 May;13(5):518–27.  
9
- 10 30. Cancer Council Australia Colorectal Cancer Guidelines Working Party. Clinical practice  
11 guidelines for the prevention, early detection and management of colorectal cancer [Internet].  
12 Sydney: Cancer Council Australia; 2017 [cited 2018 Jan 3]. Available from:  
13 [https://wiki.cancer.org.au/australia/Guidelines:Colorectal\\_cancer](https://wiki.cancer.org.au/australia/Guidelines:Colorectal_cancer)  
14  
15
- 16 31. Hullar MAJ, Burnett-Hartman AN, Lampe JW. Gut Microbes, Diet, and Cancer. *Cancer Treat*  
17 *Res*. 2014;159:377–99.  
18
- 19 32. Keum N, Giovannucci EL. Epidemiology of Colorectal Cancer. In: Loda M, Mucci L, Mittelstadt  
20 M, Van Hemelrijck M, Cotter M, editors. *Pathology and Epidemiology of Cancer*. Springer, Cham;  
21 2017. p. 391–407.  
22
- 23 33. Jenkins MA, Ait Ouakrim D, Boussioutas A, Hopper JL, Ee HC, Emery JD, et al. Revised  
24 Australian national guidelines for colorectal cancer screening: family history. *Med J Aust*. 2018 Oct  
25 29;209(10):455–60.  
26
- 27 34. Cancer Council Australia Surveillance Colonoscopy Guidelines Working Party. Clinical  
28 Practice Guidelines for Surveillance Colonoscopy. [Internet]. Sydney: Cancer Council Australia; 2019  
29 [cited 2019 Mar 29]. Available from:  
30 <https://wiki.cancer.org.au/australiawiki/index.php?oldid=200728>  
31  
32
- 33 35. Weber MF, Chiew M, Feletto E, Kahn C, Sitas F, Webster L. Cancer Screening among  
34 Immigrants Living in Urban and Regional Australia: Results from the 45 and Up Study. *Int J Environ*  
35 *Res Public Health*. 2014 Aug 14;11(8):8251–66.  
36
- 37 36. Weber MF, Banks E, Smith DP, O’Connell D, Sitas F. Cancer screening among migrants in an  
38 Australian cohort; cross-sectional analyses from the 45 and Up Study. *BMC Public Health*. 2009 May  
39 15;9:144.  
40
- 41 37. He E, Lew J-B, Egger S, Banks E, Ward RL, Beral V, et al. Factors associated with participation  
42 in colorectal cancer screening in Australia: Results from the 45 and Up Study cohort. *Prev Med*. 2018  
43 Jan;106:185–93.  
44
- 45 38. White B, Power E, Ciurej M, Lo SH, Nash K, Ormiston-Smith N. Piloting the Impact of Three  
46 Interventions on Guaiac Faecal Occult Blood Test Uptake within the NHS Bowel Cancer Screening  
47 Programme. *BioMed Res Int*. 2015;928251.  
48
- 49 39. Jonah L, Pefoyo AK, Lee A, Hader J, Strasberg S, Kupets R, et al. Evaluation of the effect of an  
50 audit and feedback reporting tool on screening participation: The Primary Care Screening Activity  
51 Report (PCSAR). *Prev Med*. 2017 Mar 1;96:135–43.  
52
- 53 40. ACE Bowel Screening Cluster. Interventions to increase bowel screening uptake: Final Report  
54 [Internet]. London: Cancer Research UK; 2017. Available from:  
55 [http://www.cancerresearchuk.org/sites/default/files/interventions\\_to\\_increase\\_bowel\\_screening\\_u](http://www.cancerresearchuk.org/sites/default/files/interventions_to_increase_bowel_screening_uptake_v1.0.pdf)  
56 [ptake\\_v1.0.pdf](http://www.cancerresearchuk.org/sites/default/files/interventions_to_increase_bowel_screening_uptake_v1.0.pdf)  
57  
58  
59  
60

- 1  
2  
3  
4  
5  
6  
7  
8  
9  
10  
11  
12  
13  
14  
15  
16  
17  
18  
19  
20  
21  
22  
23  
24  
25  
26  
27  
28  
29  
30  
31  
32  
33  
34  
35  
36  
37  
38  
39  
40  
41  
42  
43  
44  
45  
46  
47  
48  
49  
50  
51  
52  
53  
54  
55  
56  
57  
58  
59  
60
41. Worthington J, Lew J-B, Feletto E, Broun K, Durkin SJ, Wakefield MA, et al. Evaluating health benefits and cost-effectiveness of a mass-media campaign for improving participation in the National Bowel Cancer Screening Program in Australia. *Public Health*. 2020;179:90–9.
  42. Durkin SJ, Broun K, Wakefield MA. Mass media campaign impact on overall and subgroup participation rates in the Australian national bowel cancer screening program: a field experiment. 2019;In Preparation.
  43. Australian Government Department of Health. \$10 million to boost bowel cancer screening participation [Internet]. Australian Government Department of Health; 2019 [cited 2019 Mar 29]. Available from: <https://www.health.gov.au/ministers/the-hon-greg-hunt-mp/media/10-million-to-boost-bowel-cancer-screening-participation>
  44. Aran V, Victorino AP, Thuler LC, Ferreira CG. Colorectal Cancer: Epidemiology, Disease Mechanisms and Interventions to Reduce Onset and Mortality. *Clin Colorectal Cancer*. 2016 Sep;15(3):195–203.
  45. Young JM, Leong DC, Armstrong K, O’Connell D, Armstrong BK, Spigelman AD, et al. Concordance with national guidelines for colorectal cancer care in New South Wales: a population-based patterns of care study. *Med J Aust*. 2007 Mar 19;186(6):292–5.
  46. Kuhry E, Schwenk WF, Gaupset R, Romild U, Bonjer HJ. Long-term results of laparoscopic colorectal cancer resection. *Cochrane Database Syst Rev*. 2008 Apr 16;(2):CD003432.
  47. Fleisher LA, Linde-Zwirble WT. Incidence, outcome, and attributable resource use associated with pulmonary and cardiac complications after major small and large bowel procedures. *Perioper Med Lond Engl*. 2014;3:7.
  48. Wagner ADADW, Arnold D, Grothey AAG, Haerting J, Unverzagt S. Anti-angiogenic therapies for metastatic colorectal cancer. *Cochrane Database Syst Rev*. 2009 Jul 8;(3):CD005392.
  49. Australian Government Department of Health. Pharmaceutical Benefits Scheme (PBS) | Cetuximab, panitumumab and bevacizumab for metastatic colorectal cancer [Internet]. The Pharmaceutical Benefits Scheme. 2018 [cited 2019 Aug 15]. Available from: <http://www.pbs.gov.au/info/industry/listing/participants/public-release-docs/2018-02/metastatic-colorectal-cancer-february-2018>
  50. Kalyan A, Kircher S, Shah H, Mulcahy M, Benson A. Updates on immunotherapy for colorectal cancer. *J Gastrointest Oncol*. 2018 Feb;9(1):160–9.
  51. Jorgensen ML, Young JM, Solomon MJ. Optimal delivery of colorectal cancer follow-up care: improving patient outcomes. *Patient Relat Outcome Meas*. 2015 May 18;6:127–38.
  52. El-Shami K, Oeffinger KC, Erb NL, Willis A, Bretsch JK, Pratt-Chapman ML, et al. American Cancer Society Colorectal Cancer Survivorship Care Guidelines. *CA Cancer J Clin*. 2015;65(6):427–55.
  53. Young JM, Durcinoska I, DeLoyde K, Solomon MJ. Patterns of follow up and survivorship care for people with colorectal cancer in new South Wales, Australia: a population-based survey. *BMC Cancer*. 2018 Mar 27;18(1):339.
  54. Drury A, Payne S, Brady A-M. Cancer survivorship: Advancing the concept in the context of colorectal cancer. *Eur J Oncol Nurs*. 2017 Aug 1;29:135–47.

- 1  
2  
3 55. Grogan PB, Olver IN. A bowel cancer screening plan at last. *Med J Aust*. 2014 Oct  
4 20;201(8):435–6.  
5  
6 56. Owen L, Morgan A, Fischer A, Ellis S, Hoy A, Kelly MP. The cost-effectiveness of public health  
7 interventions. *J Public Health Oxf Engl*. 2012 Mar;34(1):37–45.  
8  
9 57. Australian Institute of Health and Welfare. Cancer in Aboriginal & Torres Strait Islander  
10 people of Australia [Internet]. Australian Institute of Health and Welfare. 2018 [cited 2018 May 15].  
11 Available from: [https://www.aihw.gov.au/reports/cancer/cancer-in-indigenous-](https://www.aihw.gov.au/reports/cancer/cancer-in-indigenous-australians/contents/table-of-contents)  
12 [australians/contents/table-of-contents](https://www.aihw.gov.au/reports/cancer/cancer-in-indigenous-australians/contents/table-of-contents)  
13  
14  
15

### 16 **Acknowledgements**

17 Not applicable  
18  
19

### 20 **Author statement**

21 KC conceived Pathways and developed the scope of evaluations with EF, JBL, JW, EH, MC and input  
22 from the SAC. EF authored the manuscript with input from all co-authors. All authors critically  
23 reviewed and contributed to the final manuscript.  
24  
25  
26  
27  
28

### 29 **Funding**

30 This work was supported by Cancer Council New South Wales (CCNSW).  
31  
32  
33

### 34 **Conflicts of Interest**

35 KC, EF, JW, JBL, EH, MC, NT, KB and HH receive salary support from CCNSW. KC is co-PI of unrelated  
36 investigator-initiated trial of cervical screening in Australia ('Compass') conducted by the Victorian  
37 Cytology Service, which has received a funding contribution from Roche Molecular Systems and  
38 Ventana Inc., USA. All other co-authors have no conflicts of interest to disclose.  
39  
40  
41  
42  
43  
44  
45  
46  
47  
48  
49  
50  
51  
52  
53  
54  
55  
56  
57  
58  
59  
60

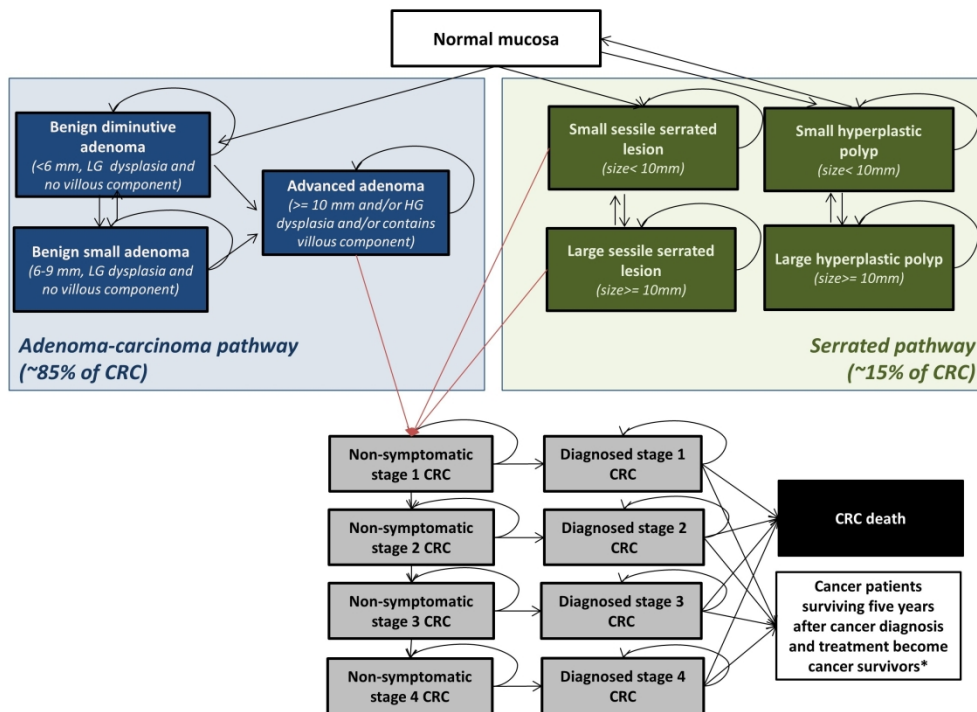

Figure 1: Schematic diagram of the Policy1-Bowel microsimulation model platform.

254x190mm (300 x 300 DPI)



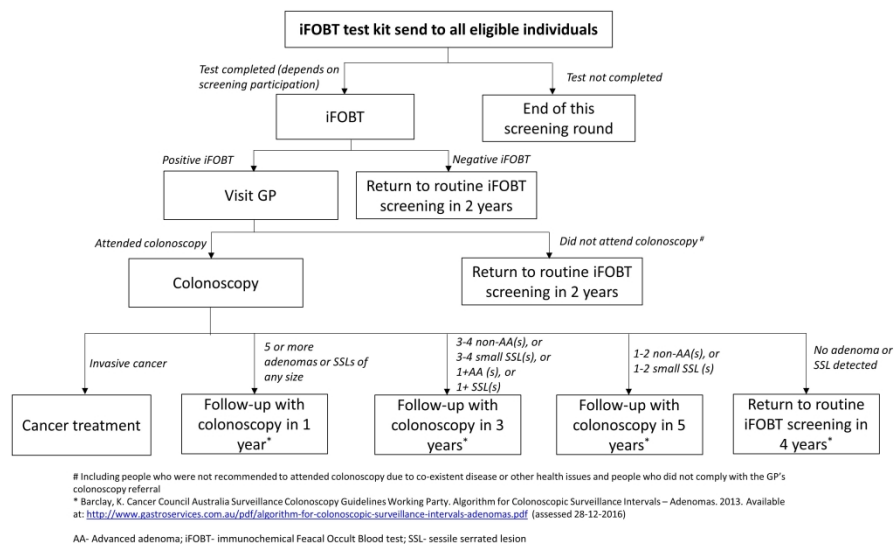

Figure 2: Modelled screening delivery pathway (based on NBCSP) modelled in the Policy1-Bowel microsimulation model platform.

338x190mm (300 x 300 DPI)

# BMJ Open

## Pathways to a Cancer-Free Future: a protocol for modelled evaluations to minimise the future burden of colorectal cancer in Australia.

|                               |                                                                                                                                                                                                                                                                                                                                                                                                                                                                                                                                                                                                                                                                                                                                                                                                                                                                                                                                                                                                                                                                                                                                                                                                                                                                                                                                                                                                                                                                                                                                                                                                                                                                                                                                                                                                                                                                                                                                                                                                                                                                                                                                                                                                                                                                                                                                                                                  |
|-------------------------------|----------------------------------------------------------------------------------------------------------------------------------------------------------------------------------------------------------------------------------------------------------------------------------------------------------------------------------------------------------------------------------------------------------------------------------------------------------------------------------------------------------------------------------------------------------------------------------------------------------------------------------------------------------------------------------------------------------------------------------------------------------------------------------------------------------------------------------------------------------------------------------------------------------------------------------------------------------------------------------------------------------------------------------------------------------------------------------------------------------------------------------------------------------------------------------------------------------------------------------------------------------------------------------------------------------------------------------------------------------------------------------------------------------------------------------------------------------------------------------------------------------------------------------------------------------------------------------------------------------------------------------------------------------------------------------------------------------------------------------------------------------------------------------------------------------------------------------------------------------------------------------------------------------------------------------------------------------------------------------------------------------------------------------------------------------------------------------------------------------------------------------------------------------------------------------------------------------------------------------------------------------------------------------------------------------------------------------------------------------------------------------|
| Journal:                      | <i>BMJ Open</i>                                                                                                                                                                                                                                                                                                                                                                                                                                                                                                                                                                                                                                                                                                                                                                                                                                                                                                                                                                                                                                                                                                                                                                                                                                                                                                                                                                                                                                                                                                                                                                                                                                                                                                                                                                                                                                                                                                                                                                                                                                                                                                                                                                                                                                                                                                                                                                  |
| Manuscript ID                 | bmjopen-2019-036475.R1                                                                                                                                                                                                                                                                                                                                                                                                                                                                                                                                                                                                                                                                                                                                                                                                                                                                                                                                                                                                                                                                                                                                                                                                                                                                                                                                                                                                                                                                                                                                                                                                                                                                                                                                                                                                                                                                                                                                                                                                                                                                                                                                                                                                                                                                                                                                                           |
| Article Type:                 | Protocol                                                                                                                                                                                                                                                                                                                                                                                                                                                                                                                                                                                                                                                                                                                                                                                                                                                                                                                                                                                                                                                                                                                                                                                                                                                                                                                                                                                                                                                                                                                                                                                                                                                                                                                                                                                                                                                                                                                                                                                                                                                                                                                                                                                                                                                                                                                                                                         |
| Date Submitted by the Author: | 08-Mar-2020                                                                                                                                                                                                                                                                                                                                                                                                                                                                                                                                                                                                                                                                                                                                                                                                                                                                                                                                                                                                                                                                                                                                                                                                                                                                                                                                                                                                                                                                                                                                                                                                                                                                                                                                                                                                                                                                                                                                                                                                                                                                                                                                                                                                                                                                                                                                                                      |
| Complete List of Authors:     | <p>Feletto, E; Cancer Research Division, Cancer Council NSW; The University of Sydney, School of Public Health</p> <p>Lew, Jie Bin; Cancer Council New South Wales, Cancer Research Division; The University of Sydney, School of Public Health</p> <p>Worthington, Joachim; Cancer Council New South Wales, Cancer Research Division; The University of Sydney, School of Public Health</p> <p>He, Emily; Cancer Council New South Wales, Cancer Research Division; The University of Sydney, School of Public Health</p> <p>Caruana, Michael; Cancer Council New South Wales, Cancer Research Division; The University of Sydney, School of Public Health</p> <p>Butler, Katherine; Cancer Research Division, Cancer Council NSW</p> <p>Hui, Harriet; Cancer Research Division, Cancer Council NSW</p> <p>Taylor, Natalie; Cancer Council, Cancer Research Division; The University of Sydney, Faculty of Medicine and Health</p> <p>Banks, Emily; Australian National University, ANU College of Medicine, Biology and Environment</p> <p>Barclay, Karen; The University of Melbourne, Northern Clinical School, Melbourne Medical School</p> <p>Broun, Kate; The Cancer Council Victoria, Centre for Behavioural Research in Cancer</p> <p>Butt, Alison; University of New South Wales, Research Strategy Office</p> <p>Carter, Rob; Deakin University, Deakin Institute for Health Research</p> <p>Cuff, Jeff; University of New South Wales, Faculty of Science Biotech &amp; Biomolecular Science; Research Advocate</p> <p>Dessaix, Anita; Cancer Council New South Wales, Cancer Prevention and Advocacy</p> <p>Ee, Hooi; Sir Charles Gairdner Hospital, Department of Gastroenterology</p> <p>Emery, Jon; University of Melbourne, General Practice and Primary Care Academic Centre</p> <p>Frayling, Ian; Cardiff University,</p> <p>Grogan, Paul; Cancer Council New South Wales, Cancer Research Division; The University of Sydney, School of Public Health</p> <p>Holden, Carol; South Australian Health and Medical Research Institute, No Australians Dying of Bowel Cancer Initiative</p> <p>Horn, Christopher; Cancer Institute New South Wales</p> <p>Jenkins, Mark; The University of Melbourne, Centre for Epidemiology and Biostatistics</p> <p>Kench, James ; Royal Prince Alfred Hospital; The University of Sydney, Faculty of Medicine and Health</p> |

|                                 |                                                                                                                                                                                                                                                                                                                                                                                                                                                                                                                                                                                                                                                                                                                                                                                                                                                                                                                                                                                                                                                                                                                                                                                                                                                                                                                                                                                                                                                                                                                                                                                                                                                                                                                                                      |
|---------------------------------|------------------------------------------------------------------------------------------------------------------------------------------------------------------------------------------------------------------------------------------------------------------------------------------------------------------------------------------------------------------------------------------------------------------------------------------------------------------------------------------------------------------------------------------------------------------------------------------------------------------------------------------------------------------------------------------------------------------------------------------------------------------------------------------------------------------------------------------------------------------------------------------------------------------------------------------------------------------------------------------------------------------------------------------------------------------------------------------------------------------------------------------------------------------------------------------------------------------------------------------------------------------------------------------------------------------------------------------------------------------------------------------------------------------------------------------------------------------------------------------------------------------------------------------------------------------------------------------------------------------------------------------------------------------------------------------------------------------------------------------------------|
|                                 | <p>Laaksonen, Maarit; University of New South Wales, Centre for Big Data Research in Health</p> <p>Leggett, Barbara; QIMR Berghofer Medical Research Institute</p> <p>Mitchell, Gillian; Peter MacCallum Cancer Institute, Parkville Familial Cancer Centre; University of Melbourne, The Sir Peter MacCallum Department of Oncology</p> <p>Morris, Susan; Research Advocate; Lynch Syndrome Australia</p> <p>Parkinson, B; Macquarie University, Macquarie University Centre for the Health Economy</p> <p>St John, D James; The Cancer Council Victoria; The University of Melbourne, Department of Medicine, The Royal Melbourne Hospital</p> <p>Taoube, Linda; The University of Sydney, School of Public Health</p> <p>Tucker, Katherine; Prince of Wales Hospital, Hereditary Cancer Centre; University of New South Wales, Prince of Wales Clinical School</p> <p>Wakefield, Melanie ; Cancer Council Victoria, Centre for Behavioural Research in Cancer</p> <p>Ward, Robyn; University of Sydney, Faculty of Medicine and Health</p> <p>Win, Aung; The University of Melbourne, Centre for Epidemiology and Biostatistics; Victorian Comprehensive Cancer Centre, Precision Prevention and Early Detection, University of Melbourne Centre for Cancer Research</p> <p>Worthley, Dan; South Australian Health and Medical Research Institute, Gastrointestinal Cancer Biology</p> <p>Armstrong, Bruce; The University of Sydney, School of Public Health</p> <p>Macrae, Finlay; Royal Melbourne Hospital, Genetics; The University of Melbourne, Department of Medicine, The Royal Melbourne Hospital</p> <p>Canfell, Karen; Cancer Council New South Wales, Cancer Research Division; The University of Sydney, School of Public Health</p> |
| <b>Primary Subject Heading</b>: | Public health                                                                                                                                                                                                                                                                                                                                                                                                                                                                                                                                                                                                                                                                                                                                                                                                                                                                                                                                                                                                                                                                                                                                                                                                                                                                                                                                                                                                                                                                                                                                                                                                                                                                                                                                        |
| Secondary Subject Heading:      | Oncology, Epidemiology, Evidence based practice, Health economics                                                                                                                                                                                                                                                                                                                                                                                                                                                                                                                                                                                                                                                                                                                                                                                                                                                                                                                                                                                                                                                                                                                                                                                                                                                                                                                                                                                                                                                                                                                                                                                                                                                                                    |
| Keywords:                       | Gastrointestinal tumours < ONCOLOGY, PUBLIC HEALTH, HEALTH ECONOMICS                                                                                                                                                                                                                                                                                                                                                                                                                                                                                                                                                                                                                                                                                                                                                                                                                                                                                                                                                                                                                                                                                                                                                                                                                                                                                                                                                                                                                                                                                                                                                                                                                                                                                 |
|                                 |                                                                                                                                                                                                                                                                                                                                                                                                                                                                                                                                                                                                                                                                                                                                                                                                                                                                                                                                                                                                                                                                                                                                                                                                                                                                                                                                                                                                                                                                                                                                                                                                                                                                                                                                                      |

SCHOLARONE™  
Manuscripts



I, the Submitting Author has the right to grant and does grant on behalf of all authors of the Work (as defined in the below author licence), an exclusive licence and/or a non-exclusive licence for contributions from authors who are: i) UK Crown employees; ii) where BMJ has agreed a CC-BY licence shall apply, and/or iii) in accordance with the terms applicable for US Federal Government officers or employees acting as part of their official duties; on a worldwide, perpetual, irrevocable, royalty-free basis to BMJ Publishing Group Ltd ("BMJ") its licensees and where the relevant Journal is co-owned by BMJ to the co-owners of the Journal, to publish the Work in this journal and any other BMJ products and to exploit all rights, as set out in our [licence](#).

The Submitting Author accepts and understands that any supply made under these terms is made by BMJ to the Submitting Author unless you are acting as an employee on behalf of your employer or a postgraduate student of an affiliated institution which is paying any applicable article publishing charge ("APC") for Open Access articles. Where the Submitting Author wishes to make the Work available on an Open Access basis (and intends to pay the relevant APC), the terms of reuse of such Open Access shall be governed by a Creative Commons licence – details of these licences and which [Creative Commons](#) licence will apply to this Work are set out in our licence referred to above.

Other than as permitted in any relevant BMJ Author's Self Archiving Policies, I confirm this Work has not been accepted for publication elsewhere, is not being considered for publication elsewhere and does not duplicate material already published. I confirm all authors consent to publication of this Work and authorise the granting of this licence.

## Pathways to a Cancer-Free Future: a protocol for modelled evaluations to minimise the future burden of colorectal cancer in Australia.

Eleonora Feletto<sup>1,2</sup>, Jie-Bin Lew<sup>1,2</sup>, Joachim Worthington<sup>1,2</sup>, Emily He<sup>1,2</sup>, Michael Caruana<sup>1</sup>, Katherine Butler<sup>1</sup>, Harriet Hui<sup>1</sup>, Natalie Taylor<sup>1,3</sup>, Emily Banks<sup>4</sup>, Karen Barclay<sup>5</sup>, Kate Broun<sup>6</sup>, Alison Butt<sup>7</sup>, Rob Carter<sup>8</sup>, Jeff Cuff<sup>9,10</sup>, Anita Dessaix<sup>1</sup>, Hooi Ee<sup>11</sup>, Jon Emery<sup>12</sup>, Ian M. Frayling<sup>13</sup>, Paul Grogan<sup>1,2</sup>, Carol Holden<sup>14</sup>, Christopher Horn<sup>15</sup>, Mark A. Jenkins<sup>16</sup>, James G Kench<sup>3,17</sup>, Maarit A. Laaksonen<sup>18</sup>, Barbara Leggett<sup>19</sup>, Gillian Mitchell<sup>20,21</sup>, Susan Morris<sup>9,22</sup>, Bonny Parkinson<sup>23</sup>, D James St John<sup>6,24</sup>, Linda Taoube<sup>2</sup>, Katherine Tucker<sup>25,26</sup>, Melanie Wakefield<sup>6</sup>, Robyn L Ward<sup>3</sup>, Aung Ko Win<sup>16,27,28</sup>, Daniel Worthley<sup>14</sup>, Bruce K Armstrong<sup>2</sup>, Finlay A Macrae<sup>24,28</sup>, Karen Canfell<sup>1,2,26</sup>

<sup>1</sup>Cancer Council NSW, Sydney, NSW, Australia

<sup>2</sup>School of Public Health, Sydney Medical School, University of Sydney, NSW, Australia

<sup>3</sup>Faculty of Medicine and Health, University of Sydney, Sydney, Australia

<sup>4</sup>National Centre for Epidemiology and Population Health, Australian National University, Canberra, ACT, Australia

<sup>5</sup>Northern Clinical School, University of Melbourne, Melbourne Medical School, VIC, Australia

<sup>6</sup>Cancer Council Victoria, Melbourne, VIC, Australia

<sup>7</sup>Research Strategy Office, University of New South Wales, Australia

<sup>8</sup>Deakin Health Economics, Institute for Health Transformation, Faculty of Health, Deakin University, Victoria, Australia

<sup>9</sup>Research Advocate

<sup>10</sup>Faculty of Science Biotech & Biomolecular Science, University of New South Wales

<sup>11</sup>Department of Gastroenterology, Sir Charles Gairdner Hospital, Nedlands, WA, Australia.

<sup>12</sup>Centre for Cancer Research and Department of General Practice, University of Melbourne.

<sup>13</sup>Inherited Tumour Syndromes Research Group, Division of Cancer & Genetics, Cardiff University, UK

<sup>14</sup>South Australian Health and Medical Research Institute, Adelaide, Australia

<sup>15</sup>Cancer Institute NSW

<sup>16</sup>Centre for Epidemiology and Biostatistics, Melbourne School of Population and Global Health University of Melbourne, Australia

<sup>17</sup>Department of Tissue Pathology & Diagnostic Oncology, Royal Prince Alfred Hospital, Sydney, Australia

<sup>18</sup>Centre for Big Data Research in Health, University of New South Wales, Australia

<sup>19</sup>QIMR Berghofer Medical Research Institute, Queensland, Australia

<sup>20</sup>Familial Cancer Centre, Peter MacCallum Cancer Centre, Melbourne VIC Australia

<sup>21</sup>Sir Peter MacCallum Dept of Oncology, University of Melbourne, Melbourne, VIC Australia

<sup>22</sup>Lynch Syndrome Australia, Queensland, Australia

<sup>23</sup>Macquarie University Centre for the Health Economy, Macquarie University, NSW, Australia

<sup>24</sup>Department of Medicine, The Royal Melbourne Hospital, The University of Melbourne, VIC, Australia

<sup>25</sup>Hereditary Cancer Centre, Prince of Wales Hospital, Randwick, New South Wales, Australia

<sup>26</sup>Prince of Wales Clinical School, The University of New South Wales, Australia

<sup>27</sup>Precision Prevention and Early Detection, University of Melbourne Centre for Cancer Research, Victorian Comprehensive Cancer Centre, Victoria, Australia

<sup>28</sup>Genetic Medicine, Royal Melbourne Hospital, Parkville, Victoria, Australia

Corresponding author: Eleonora Feletto, Cancer Council NSW, 153 Dowling St, Woolloomooloo, NSW 2011 Australia email: [eleonoraf@nswcc.org.au](mailto:eleonoraf@nswcc.org.au)

Keywords: colorectal cancer, prevention, early detection, screening

## Abstract

### Introduction

With almost 50% of cases preventable and the Australian National Bowel Cancer Screening Program in place, colorectal cancer (CRC) is a prime candidate for investment to reduce cancer burden. The challenge is determining effective ways to reduce morbidity and mortality and their implementation through policy and practice. *Pathways-Bowel* is a multi-stage program that aims to identify best-value investment in CRC control by integrating expert and end-user engagement; relevant evidence; modelled interventions to guide future investment; and policy-driven implementation of interventions using evidence-based methods.

### Methods and analysis

*Pathways-Bowel* is an iterative work program incorporating a calibrated and validated CRC natural history model for Australia (*Policy1-Bowel*) and assessing the health cost outcomes and resource use of targeted interventions. Experts help identify and prioritise modelled evaluations of changing trends and interventions and critically assess results to advise on their real-world applicability. Where appropriate the results are used to support public policy change and make the case for optimal investment in specific CRC control interventions. Fourteen high priority evaluations have been modelled or planned, including evaluations of CRC outcomes from the changing prevalence of modifiable exposures, including smoking and body fatness; potential benefits of daily aspirin intake as chemoprevention; increasing CRC incidence in people aged <50 years; increasing screening participation in the general and Aboriginal and Torres Strait Islander populations; alternative screening technologies and modalities; and changes to follow-up surveillance protocols. *Pathways-Bowel* is a unique, comprehensive approach to evaluating CRC control; no prior body of work has assessed the relative benefits of a variety of interventions across CRC development and progression to produce a list of best-value investments.

### Ethics and dissemination

Ethics approval was not required as human participants were not involved. Findings are reported in a series of papers in peer-reviewed journals and presented at fora to engage the community and policymakers.

### Article summary

#### Strengths and limitations

- *Pathways-Bowel* leverages a fully calibrated natural history microsimulation model for CRC (*Policy1-Bowel*) to model evaluations of existing and hypothetical trends and interventions to improve CRC outcomes for Australians.
- It aims to bridge the gap between end-user priorities, epidemiological and statistical research outputs, and practical applicability from health, resource, and health system cost perspectives.
- Findings from the *Pathways-Bowel* program are applicable to Australia; however, the flexibility of *Policy1-Bowel* enables its future adaptation to other settings where location-specific data are available.
- The predictive modelling used is limited by and dependent on the available data sources and assumptions made when empirical data are absent.
- The overarching *Pathways* program generates evidence on the best-value investments or “best buys” in cancer control across multiple cancers to inform future decision making.

Word count:

- Abstract: 300
- Body: 3944

## Introduction

### *Background*

Colorectal cancer (CRC) was the third most commonly diagnosed cancer in Australia in 2017, with estimated incidence of 63.4 per 100,000 and 45.8 per 100,000 in males and females, respectively (1,2). A small proportion of CRC cases are found in higher-risk patients and associated with strong family history of CRC or hereditary syndromes. Lynch syndrome and Familial Adenomatous Polyposis account for ~3% and less than 1% of new CRC cases, respectively (3–5). The Australian Burden of Disease Study found there were over 95,000 years of healthy life lost due to CRC in 2015 which accounted for 2% of the total disease burden in Australia (6). From 1982 to 2015, CRC incidence and mortality rates decreased (from 58.3 to 57.4 and 32.3 to 19.2 per 100,000, respectively) (7), with noted gender, socio-economic and geographic disparities in these reductions (8–11). The 5-year overall survival from CRC in Australia increased from 51% in 1985–1989 to 70% in 2010-2014 (12). A recent analysis highlighted increasing CRC incidence in people under 50 years of age, which could be partially attributable to the rising prevalence of harmful risk factors, but there are, as yet, no confirmed causes (13). Nearly half (49.8%) of new CRC cases in Australia are attributable to known modifiable risk factors (14) and therefore could be influenced by primary prevention interventions. Evidence on policies and interventions for preventing CRC through lifestyle change varies widely between risk factors. On current evidence, the best buy in CRC control is increasing participation in Australia’s National Bowel Cancer Screening Program (NBCSP)(15) however fewer than half the eligible population are participating. From 2020, all Australians aged 50-74 will be invited to participate in biennial screening using an immunochemical faecal occult blood test (iFOBT) (12). Further decreases in incidence and mortality of 23% and 36%, respectively, are anticipated by 2040 at current participation rates with full implementation of the NBCSP. (15).

### *Pathways*

“*Pathways to a cancer-free future*” (*‘Pathways’*) is a program of research developed to focus investment where the biggest impact can be made at a population level. It aims to identify the best-value investments, or “best buys”, in cancer control to inform future decision making. First described in relation to cervical cancer (16), the *Pathways* model is now being applied to five major cancers: cervical, lung, colorectal, prostate, and breast cancer, and to cancers relating to Lynch syndrome and early work has commenced in melanoma and cancers of the ovary and liver. *Pathways*-Bowel refers to the program focused on CRC, with a detailed assessment of high-risk individuals with Lynch syndrome and other Lynch-related cancers incorporating evidence-based intervention implementation currently underway (17,18), as part of *Pathways*-Lynch. *Pathways*-Bowel will span



1  
2  
3 the CRC control continuum from primary prevention to survivorship. It aims to model comparative  
4 evaluations of CRC interventions guided by the best available evidence to underpin future research  
5 investment and policy implementation. **The aim of the current article is to outline the design and**  
6 **objectives of *Pathways-Bowel*. *Pathways-Bowel* will inform ongoing and planned modelled**  
7 **evaluations of CRC interventions by integrating expert and end-user engagement; relevant**  
8 **evidence; modelled interventions to guide future investment; and policy-driven implementation**  
9 **of interventions using evidence-based methods.**  
10  
11  
12  
13  
14  
15

## 16 **Methods and Analysis**

### 17 *Study design*

18 *Pathways* as an overarching program was previously described (16). Since that description, *Pathways*  
19 has changed from a staged approach to a more iterative process. As modelled evaluation results  
20 become available, they are immediately reviewed and disseminated as appropriate to support  
21 potential policy change.  
22  
23  
24  
25  
26  
27

### 28 *Patient and Public Involvement Statement*

29 Multisectoral stakeholder involvement in *Pathways-Bowel* is achieved via a multidisciplinary  
30 Scientific Advisory Committee (SAC) including academics, clinicians, consumers and advisers on  
31 policy. The SAC is designed to ensure involvement from relevant stakeholders outside the core  
32 research team and confirm the relevance of modelled evaluations and their translation. The SAC was  
33 first convened to discuss CRC in March 2018. Since then, members continue to be consulted based  
34 on their area of expertise to guide, critique and support the program and its recommendations, thus  
35 ensuring there is involvement from interested parties throughout the process.  
36  
37  
38  
39  
40  
41  
42

### 43 *Processes and analysis for modelled evaluations of interventions*

#### 44 Modelling platform: *Policy1-Bowel*

45 We use a previously developed microsimulation model platform, *Policy1-Bowel*, to perform  
46 predictive modelled evaluations of CRC interventions in Australia (19). *Policy1-Bowel* is a  
47 comprehensive platform that synthesises clinical, epidemiological, demographic, behavioural and  
48 economic data and has been used to simulate the impact of CRC screening in Australia (15). Existing  
49 *Policy1-Bowel* evaluations have assessed a range of screening scenarios and provided estimates of  
50 CRC outcomes, resource utilisation and costs. They have, for example, analysed the use of various  
51 CRC screening test technologies and target age ranges for the NBCSP to inform Australian guidelines  
52 (20,21). The model platform is implemented in C++ and includes several interconnected elements to  
53  
54  
55  
56  
57  
58  
59  
60

1  
2  
3 evaluate the NBCSP. It incorporates the development of CRC from adenoma (via the adenoma-  
4 carcinoma pathway) and sessile serrated lesions (via the serrated pathways) and survival from CRC  
5 (see Figure 1). *Policy1-Bowel* then incorporates screening for average-risk people, including post-  
6 screening diagnosis, treatment, and surveillance (Figure 2 summarises the current NBCSP screening  
7 delivery pathways included). As evaluations are conducted, single- or multiple-cohort approaches  
8 are used to simulate the development of polyps and CRC, screening, diagnosis and other  
9 downstream NBCSP processes in the target population over a time period of interest. The resulting  
10 evaluation is informed by Australian-specific demographic data and economic and health utilities  
11 data obtained from national and international literature (including cost and quality-adjusted life-  
12 years) to produce cross-sectional results for the population. For modelled evaluations of CRC  
13 interventions, data are sourced from national surveys and data collection agencies (e.g. Australian  
14 Institute of Health and Welfare: AIHW) and the published literature including meta-analyses,  
15 systematic reviews, randomised controlled trials, cohort studies and other relevant publications.  
16 Where empirical data are not available, the SAC and other experts are consulted to guide the  
17 assumptions used.

#### 30 *Policy1-Bowel* validation

31 Extensive calibration of the model has been carried out against a wide range of current NBCSP  
32 outputs and other Australian data sources (15). The model has also been validated against the  
33 findings of other well-established microsimulation models and multiple large randomised-controlled  
34 trials with long-term follow-up. Further details of the model used in this work, and descriptions of its  
35 development, parameterisation, data sources, calibration, and validation outcomes, have been  
36 published previously and technical appendices are available (15,19–21).

#### 43 Economic Analysis

44 The modelled evaluations result in economic analyses to develop a business case for investment.  
45 *Pathways-Bowel* (and all *Pathways*) uses a common framework so the best value investment, or  
46 “best buy”, can be compared within and between analyses. This framework is in development and  
47 will be based on similar initiatives internationally (22). The populations of interest are average-risk  
48 Australians and sub-groups relevant to the modelled evaluations. For each evaluation, several  
49 primary outcomes are considered, including:

- 55 i) health benefits– e.g. reduction in lifetime risk of CRC incidence and mortality;
  - 56 ii) harms – e.g. hospitalisations, adverse events of colonoscopy;
- 57  
58  
59  
60

- 1
  - 2
  - 3
  - 4
  - 5
  - 6
  - 7
  - 8
  - 9
- iii) resource use – e.g. health costs of CRC (hospitals, workforce, screening and diagnostic tests, program communications etc.); and
  - iv) health-economic outcomes – e.g. discounted and undiscounted lifetime cost, life-years, quality-adjusted-life years, disability-adjusted life years and cost-effectiveness.

For each intervention, the primary outcomes listed may be expanded or differ. The comparator for analyses is the general population or specific sub-group of interest without the influence of the intervention being assessed. The potential harms associated with interventions are often minimal, but *Pathways* will enable their characterisation and quantification. For example, the health benefits and harms for screening would also include colonoscopy-related adverse events and number-needed-to colonoscope per CRC death prevented.

A health services perspective is applied, and efforts are being made to expand to the societal perspective including characterisation of out-of-pocket expenses. From a health services perspective, costs incurred by governments and the health system over a person's lifetime are incorporated. For each evaluation, multiple time horizons may be chosen as appropriate to the specific intervention, but the common time horizon is to 2050 (as this timeline indicates a change within a generation). In terms of an indicative willingness-to-pay (WTP) threshold, \$30,000-50,000 per life-year saved has previously been used for evaluations of interventions for CRC and cervical cancer (20,23,24). In *Pathways*, a 5% annual discount rate and the indicative WTP threshold of \$30,000-50,000/life-year saved are used, with alternative WTP thresholds included for comparability. Our focus is to quantify and compare cost-effectiveness in all our analyses. One-way and probabilistic sensitivity analyses and uncertainty analyses will be conducted as required to assess the impact of model parameter uncertainties on the key model findings.

#### Rationale for modelled evaluations of CRC interventions

Under the guidance of the SAC, a list of priority modelled evaluations for CRC interventions was compiled. Evaluations are preceded by exploratory scoping reviews of the literature to identify potential interventions, and are escalated to a full systematic review to source evidence for predictive modelling as required and determined by the SAC. The ongoing and planned interventions are listed in Table 1 and represent the first series of evaluations. Broadly, these evaluations cover interventions to reduce CRC risk, interventions in light of changing incidence trends, modifications to the NBCSP via target age groups, increased participation and alternative screening methods, and improved surveillance management. Findings have and will continue to be reviewed by the SAC as required. At a later date, these evaluations will grow and could include topics of growing public

1  
2  
3 interest, such as the promotion of healthy diet, and extend to later stages of CRC control as evidence  
4 becomes available.  
5  
6  
7

8 While *Policy1-Bowel* has been used to evaluate the NBCSP, it is a flexible and dynamic model which  
9 can be adapted to incorporate both alternative screening interventions as well as interventions  
10 addressing other stages of the CRC continuum. *Policy1-Bowel* proves a critical tool for assessing the  
11 “best buys” for CRC. The section below outlines how *Pathways-Bowel* is being used in the contexts  
12 of primary prevention, screening and early detection and treatment for CRC.  
13  
14  
15  
16  
17

#### 18 Primary Prevention: Reducing risk

19 Promoting healthy behaviours and reducing risk through primary prevention can play an important  
20 role in CRC control (14). Targeted primary prevention interventions to reduce CRC risk could address  
21 any or all of the following: tobacco use, alcohol use, body fatness, insufficient physical activity,  
22 insufficient dietary fibre intake, and excess red and processed meat intake (25–27). Except for  
23 tobacco use, the prevalence of these risk factors has increased in Australians in recent decades and  
24 for some key risk factors, such as body fatness, prevalence in children is rising and calls for action are  
25 increasing (28). The 2017 Australian clinical practice guidelines for CRC recommend low-dose daily  
26 aspirin use for all people aged 50–70, as evidence suggests its potential effectiveness in CRC primary  
27 prevention (29,30). More recent studies have begun exploring the role of the gut microbiota in the  
28 development of CRC, which can be indirectly affected by diet (31). In practice, evidence-based  
29 interventions addressing these risk factors are challenging to comprehensively evaluate without  
30 information on medium to long term CRC outcomes. *Pathways-Bowel* will synthesise the available  
31 evidence from national and international data sources and published evidence to estimate the likely  
32 impact on CRC outcomes in the future for modelled evaluations. Initially, the priorities in this area  
33 (Table 1) are: (1) changing smoking prevalence, (2) changing body fatness prevalence and  
34 distribution, and (3) impact of daily aspirin prophylaxis. Other behaviours, such as alcohol  
35 consumption and diet, may be added at a later stage.  
36  
37  
38  
39  
40  
41  
42  
43  
44  
45  
46  
47  
48  
49

#### 50 Screening and Early Detection: NBCSP outcomes

51 Identification and removal of precancerous adenomas can prevent CRC development, and early  
52 detection of malignancies improves survival. The technology for these interventions is effective,  
53 available, affordable and acceptable, making CRC an ideal candidate for an organised population  
54 screening program (32). The NBCSP participation rate over 2016-2017 period was about 40%  
55 nationally (12). Current reported rates of colonoscopy for assessment of individuals with a positive  
56  
57  
58  
59  
60

1  
2  
3 NBCSP-iFOBT test are approximately 66%, with known underreporting (12). Recommended  
4 screening for people at intermediate or high CRC risk due to family history of CRC or hereditary  
5 syndromes is more intense, beginning at a younger age, and may include iFOBT and colonoscopy  
6 screening depending on level of risk, informed by evidence (33). In addition, ongoing surveillance of  
7 individuals with either a positive iFOBT or polyps removed at colonoscopy follows varying  
8 management recommendations based on individual risk and colonoscopy results (34).  
9

10  
11  
12  
13  
14  
15 National reports issued by the AIHW, along with other studies, have drawn attention to NBCSP  
16 participation disparities by gender, geographic location, Indigenous status, place of birth and  
17 language spoken at home (12,35–37). Interventions to promote CRC screening that are used revolve  
18 largely around general population awareness and health organisation or practitioner endorsement  
19 of participation and follow-up (38–40). Efforts are now being made by government and not-for-  
20 profit organisations to improve NBCSP participation (41–43). Such interventions are likely to be cost-  
21 effective investments (41,42). Evaluations of interventions to support compliance with  
22 recommendations for screening, follow-up and surveillance and to assess the best use of existing  
23 health resources could also be conducted, when data on the performance of these interventions are  
24 available.  
25  
26  
27  
28  
29  
30  
31

32  
33  
34 Australia has a national organised, federally funded screening program that began in 2006. It has  
35 undergone phased roll-out, nearing full implementation, and should be taken into account in any  
36 modelled evaluation. The *Pathways*-Bowel priority areas cover predictive modelling of the NBCSP  
37 outcomes under a range of conditions or changes in the external environment or program (Table 1).  
38 These scenarios are: (1) changing temporal incidence trends, (2) targeting NBCSP participation in  
39 population subgroups, (3) targeting NBCSP participation to a broader age range, (4) long-term NBCSP  
40 participation at varying rates, (5) NBCSP participation increased by simulated mass-media  
41 campaigns, (6) using alternative technologies, and (7) modifying surveillance management.  
42  
43  
44  
45  
46  
47

#### 48 Treatment

49  
50 Once diagnosed, surgery is generally considered as initial treatment, with or without adjuvant  
51 chemotherapy or radiation therapy (44,45). The goal of surgery is to remove any tumour as well as  
52 surrounding tissue either laparoscopically or via traditional open surgery (46). Variations in  
53 treatment pathways more often relate to adjuvant chemotherapy where there are differences in  
54 guidelines and outcomes based on stage, location and genetic mutations. Metastatic disease is  
55 treated with systemic chemotherapy and biological therapies. Bevacizumab, added to the  
56  
57  
58  
59  
60

1  
2  
3 Pharmaceutical Benefit Schedule (PBS) for Australian Government subsidies in 2009, can be used in  
4 addition to chemotherapy in metastatic CRC cases and has been found to prolong both progression-  
5 free survival (from 7.1 to 9.7 months) and overall survival (from 17.7 to 20.5 months) in first- and  
6 second-line therapy (47). Cetuximab and panitumumab are also PBS-subsidised for use in patients  
7 with RAS wild-type CRC (48). Besides these, there have been few modifications to the PBS related  
8 directly to CRC therapies. Immunotherapy has proven effective in early and advanced microsatellite  
9 unstable CRC tumours, which can comprise 15% of all CRC or more for those under 50 years.  
10  
11 Research continues in this area with an active interest in the concept of personalised medicine with  
12 therapies for specific CRC subtypes, including the possible use of organoids to predict therapy  
13 response (49,50). There have been calls for further research into several new immune agents and  
14 other therapies that could change patient outcomes. In future, evaluations of treatment options and  
15 their associated outcomes can be conducted as part of *Pathways-Bowel* to determine both the  
16 therapeutic- and cost-effectiveness of existing and novel therapies as evidence becomes available in  
17 Australia.

### 28 Survivorship

29  
30 With 70% 5-year overall survival (2010–2014) and declines in mortality predicted to continue (12),  
31 survivorship issues are growing in relevance and importance. Most evidence is focused on patient  
32 surveillance for recurrence with differences across available guidelines on the frequency and timing  
33 of follow-up tests (51). Survivorship issues include physical, psychological and social challenges as  
34 well as ongoing healthcare needs (51–54). Australian evidence has suggested care is highly variable  
35 in CRC survivors and disparities by socio-economic group are apparent (53). American guidelines for  
36 CRC survivorship have highlighted the role of risk-based health care and there has been a shift in  
37 focus to improving patient outcomes through survivorship care plans and coordinated care (51,52).  
38 Evaluations of survivorship issues and related interventions to improve outcomes will be integrated  
39 into future versions of *Pathways-Bowel*.

### 48 Preliminary Results

49  
50 This program formalises an existing ongoing body of research which has already produced outputs.  
51 Work initially focused on evaluating the NBCSP using both predictive modelling and epidemiological  
52 research (15,20,21,37,41). An evaluation of NBCSP effectiveness and cost-effectiveness at various  
53 participation levels showed that increasing participation from 40% to 60% would prevent 83,800  
54 deaths from 2015-2040 and reduce annual expenditure on CRC control within a decade of full NBCSP  
55 rollout (15). We also explored the impact of optimistic NBCSP adherence rates, possibly beyond  
56  
57  
58  
59  
60

1  
2  
3 those achievable in practice, to determine whether the impact of such an intervention is substantial  
4 and worth pursuing further (55).  
5  
6  
7

8 Alternative screening methods using different NBCSP screening modalities or different screening age  
9 groups have also been evaluated (20,21). The alternative technologies evaluated were plasma DNA  
10 testing, faecal DNA testing, computed tomography colonography, flexible sigmoidoscopy, and  
11 colonoscopy (21). Extensions to the target age range for the general population included extending  
12 to people in their 40s and/or people in their 80s (20). Considering the health outcomes and cost-  
13 effectiveness, the studies concluded that the planned NBCSP using biennial iFOBT and targeting  
14 people aged 50-74 years is currently the best option for CRC screening in Australia, and achieving  
15 higher screening participation within that age range can save more lives and improve the long-term  
16 cost-effectiveness (20,21). These results had a direct impact on clinical practice and policy as they  
17 were used to inform the 2017 “Clinical practice guidelines for the prevention, early detection and  
18 management of colorectal cancer”, approved by the National Health and Medical Research Council,  
19 and guided recommendations for the NBCSP (29).  
20  
21  
22  
23  
24  
25  
26  
27  
28  
29

30 In addition to the planned modelled evaluations, epidemiological data will also be assessed to  
31 quantify and characterise screening occurring outside the NBCSP, which is thought to be  
32 considerable and may impact estimates of the benefits of increasing participation in NBCSP (56).  
33 Further work has been undertaken and continues to inform guidelines and policy in areas of CRC  
34 management, such as the updated national surveillance colonoscopy guidelines (34). As additional  
35 evidence accumulates for potential interventions, these will be explored in future modelled  
36 evaluations and used to inform guidelines and policy change discussions. Notably, the *Policy1-Bowel*  
37 platform was used to evaluate a recent pilot mass-media campaign aimed at increasing NBCSP  
38 participation; its results prompted a \$10 million government investment in a national mass-media  
39 campaign (43). This provides a clear demonstration on the usefulness of *Pathways-Bowel* in guiding  
40 investment and policy implementation (41–43).  
41  
42  
43  
44  
45  
46  
47  
48  
49

## 50 Discussion

51 The proven ability and future capacity of the *Pathways* program to identify the best-value  
52 investments in cancer control is critical in public health decision making. *Pathways* is a way to assess  
53 the impact of many more interventions than could be subject to clinical trials; the interventions can  
54 even be complementary, provided they are anchored in the real world. Internationally it has been  
55 recognised that demonstrating the cost-effectiveness of public health interventions helps to  
56  
57  
58  
59  
60

1  
2  
3 underpin commitment from policymakers and funders (57). However, the varying methods by which  
4 interventions are evaluated makes them difficult to compare and subject to methodological  
5 confounding (57).  
6  
7  
8  
9

10 *Pathways-Bowel* is a unique, evidence-based, comprehensive approach to CRC control initially  
11 focused on screening interventions and their effectiveness in relation to the evolving knowledge of  
12 the natural history of CRC. There is relevant evidence in CRC, but no prior body of work has assessed  
13 the relative benefits of interventions across the CRC spectrum in a systematic way using a health  
14 economics framework and producing “best buys” for the nation. By providing uniformly obtained,  
15 high quality evidence guided by a standardised framework, which is in development, *Pathways-*  
16 *Bowel* has the capacity to drive CRC control change and improve outcomes for Australians across the  
17 entire spectrum of risk.  
18  
19  
20  
21  
22  
23  
24

25 *Pathways-Bowel* engages and involves researchers, clinicians, consumers, policymakers and other  
26 key stakeholders from its outset and throughout the process. Findings are presented so stakeholders  
27 can use the information to guide policy change priorities, funding recommendations and decisions,  
28 and evidence-based advocacy for improved outcomes. Early results are integrated with policy and  
29 advocacy efforts through local independent cancer control agencies with a track record in changing  
30 policy. The findings may also identify areas where further research could facilitate evaluations and  
31 guide research priority setting by funders.  
32  
33  
34  
35  
36  
37  
38

39 The predictive modelling used in the *Pathways* program is not without its limitations. It is dependent  
40 on the available data sources and assumptions made in the absence of robust data. In Australia we  
41 are fortunate to have high quality data available on CRC incidence and mortality and regular  
42 monitoring reports made publicly available on the performance of the NBCSP. These data have been  
43 used to develop a robust and sound *Policy1-Bowel* platform. Nevertheless, the modelled results  
44 remain predictions. It is through extensive validation with trial outcomes, continual improvement of  
45 the model, and input of updated real world observational information as it becomes available, that  
46 the outputs are strengthened.  
47  
48  
49  
50  
51  
52  
53

54 In terms of health economics, the health services perspective used limits the interpretation of  
55 results. Economic modelling, by itself, does not explicitly aid policymakers to maximise equity.  
56 However, more broadly, the *Pathways-Bowel* program of research embeds equity as a pillar.  
57 Through *Pathways*, standard economic analyses are complemented by systematic predictive  
58  
59  
60



1  
2  
3 modelling for specific groups and issues. Although applicable to the Australian general population,  
4 the outcomes can be evaluated for other contexts where data are available. Aboriginal and Torres  
5 Strait Islander peoples, for example, have seen varying trends in CRC incidence and mortality over  
6 time when compared to the Australian population, with significant increase in incidence, no  
7 statistically significant trend in mortality, and a lower 5-year relative survival (58%) (58). Evaluations  
8 are being done for this population group to assess the impact of NBCSP screening from age 40 to 74,  
9 and modelling of sub-groups can be extended to culturally and linguistically diverse populations  
10 living in Australia as required. Overall, the flexibility of the modelling platform used in *Pathways-*  
11 *Bowel* allows for its application to other settings in the future, both for developed and developing  
12 countries, and this has already begun for China.

13  
14  
15 While the current focus is on prevention and screening, *Pathways-Bowel* and the *Policy1-Bowel*  
16 platform have the flexibility to evaluate diagnosis, treatment and survivorship interventions as  
17 evidence is gathered. The capacity of the model is continually being extended and strengthened with  
18 each new modelled evaluation performed. There is much promise in current research to identify  
19 optimal approaches to population-based screening for CRC in Australia. The *Pathways* program has  
20 already been established based on a comprehensive analysis of the associated benefits, harms, and  
21 costs. The next step, implementation of interventions and policies into practice, is crucial for  
22 ensuring the benefits of optimal approaches are realised by the Australian population, and has  
23 begun for Lynch Syndrome patients (18). Evidence-based approaches to inform “best buys” in policy  
24 reform, accounting for context, system complexity and stakeholder perspectives, is a fundamental  
25 prerequisite for successful and sustained translation of discoveries into real world settings. The  
26 *Pathways* program presents the opportunity to continually optimise evidence-based support for  
27 cancer control interventions.

### 28 29 30 **Ethics and dissemination**

31 The *Pathways-Bowel* protocol for modelled evaluations has been reviewed and approved by the  
32 SAC. No human participants are involved to perform modelled evaluations and therefore Human  
33 Research Ethics Committee was not required. Where epidemiological analyses are planned and  
34 require ethics approval, it will be sought. No deviations from the protocol will be made without prior  
35 review and approval of the relevant working party leads from the SAC.

### 36 37 38 **Study status**

1  
2  
3 *Pathways-Bowel* officially commenced in early 2017 and is an ongoing collaboration with the SAC  
4 and other CRC-specialist researchers. As results become available, they are reviewed and prepared  
5 for peer-reviewed publication. The status is outlined in Table 1. The expected completion date for  
6 the currently outlined evaluations is 2023.  
7  
8  
9  
10  
11  
12  
13  
14  
15  
16  
17  
18  
19  
20  
21  
22  
23  
24  
25  
26  
27  
28  
29  
30  
31  
32  
33  
34  
35  
36  
37  
38  
39  
40  
41  
42  
43  
44  
45  
46  
47  
48  
49  
50  
51  
52  
53  
54  
55  
56  
57  
58  
59  
60

For peer review only

List of figures:

Figure 1: Schematic diagram of the *Policy1-Bowel* microsimulation model platform.

Figure 2: Modelled screening delivery pathway (based on NBCSP) modelled in the *Policy1-Bowel* microsimulation model platform.

**Table 1: Priority modelled evaluations for CRC interventions**

| Evaluation                                                                                                                                                                                   | Focus Area                                                                      | Status    |
|----------------------------------------------------------------------------------------------------------------------------------------------------------------------------------------------|---------------------------------------------------------------------------------|-----------|
| Impact* of changing smoking prevalence on CRC                                                                                                                                                | Reducing risk of CRC                                                            | Ongoing   |
| Impact* of changing body fatness prevalence and distribution on CRC                                                                                                                          | Reducing risk of CRC                                                            | Ongoing   |
| Impact* of daily aspirin prophylaxis on CRC                                                                                                                                                  | Reducing risk of CRC                                                            | Ongoing   |
| Impact* of NBCSP in the long term due to the increasing CRC incidence in younger cohorts                                                                                                     | NBCSP outcomes: Changing temporal trends                                        | Ongoing   |
| Impact* of extending the NBCSP to younger ages for birth cohorts with increasing CRC rate                                                                                                    | NBCSP outcomes: Changing temporal trends                                        | Ongoing   |
| Impact* of extending the NBCSP to people aged 40-49 years for the Aboriginal and Torres Strait Islander peoples                                                                              | NBCSP outcomes: Targeting population subgroups with different CRC risk profiles | Ongoing   |
| Impact* of extending the NBCSP to younger (40-49 years) and/or older (75-84 years) ages of average-risk Australians                                                                          | NBCSP outcomes: Targeting NBCSP participation to a broader age range            | Published |
| Impact* of the NBCSP at currently observed rates in the long term                                                                                                                            | NBCSP outcomes: Long-term NBCSP participation                                   | Published |
| Impact* of increasing NBCSP participation to 60 and 70%                                                                                                                                      | NBCSP outcomes: Increasing NBCSP participation rates                            | Published |
| Impact* of optimising NBCSP adherence (iFOBT screening and diagnostic assessment) to 90% and quantifying a maximum threshold for cost-effective investment towards improving NBCSP adherence | NBCSP outcomes: Increasing NBCSP participation rates                            | Complete  |
| Impact* of mass media campaigns aimed at increasing participation in NBCSP                                                                                                                   | NBCSP outcomes: Increasing NBCSP participation rates                            | Complete  |
| Impact* of including twice-off screening colonoscopies at age 40 and 60 in addition to the current NBCSP                                                                                     | NBCSP outcomes: Alternative screening methods                                   | Complete  |
| Impact* of 13 alternative screening approaches involving use of iFOBT, colonoscopy, sigmoidoscopy, computed tomographic colonography, faecal DNA, and plasma DNA for the NBCSP               | NBCSP outcomes: Alternative screening methods                                   | Published |
| Impact* of modifications to colonoscopic surveillance protocols, especially the newly ratified Australian colonoscopy surveillance guidelines to the previous guidelines                     | NBCSP outcomes: Modifying colonoscopic surveillance management                  | Ongoing   |

\*The impact of listed evaluations assessed in terms of health outcomes, resource use and costs.

Abbreviations: NBCSP: National Bowel Cancer Screening Program; CRC: Colorectal Cancer; iFOBT: immunochemical faecal occult blood test

## References

1. Australian Institute of Health and Welfare. Cancer in Australia 2019. Canberra: AIHW; 2019. Report No.: Cancer series no.119. Cat. no. CAN 123.
2. Australian Institute of Health and Welfare. Cancer in Australia: Actual incidence data from 1982 to 2013 and mortality data from 1982 to 2014 with projections to 2017. *Asia Pac J Clin Oncol*. 2018;14(1):5–15.
3. Lynch HT, Lynch PM, Lanspa SJ, Snyder CL, Lynch JF, Boland CR. Review of the Lynch syndrome: history, molecular genetics, screening, differential diagnosis, and medicolegal ramifications. *Clin Genet*. 2009 Jul;76(1):1–18.
4. Karstensen JG, Burisch J, Pommergaard H-C, Aalling L, Højen H, Jespersen N, et al. Colorectal Cancer in Individuals With Familial Adenomatous Polyposis, Based on Analysis of the Danish Polyposis Registry. *Clin Gastroenterol Hepatol*. 2019 Oct 1;17(11):2294-2300.e1.
5. Hampel H, Frankel WL, Martin E, Arnold M, Khanduja K, Kuebler P, et al. Feasibility of screening for Lynch syndrome among patients with colorectal cancer. *J Clin Oncol*. 2008 Dec 10;26(35):5783–8.
6. Australian Institute of Health and Welfare. Australian Burden of Disease Study: impact and causes of illness and death in Australia 2015. Canberra: AIHW; 2019. Report No.: Australian Burden of Disease Study series no. 19. Cat. no. BOD 22.
7. Australian Institute of Health and Welfare. Australian Cancer Incidence and Mortality (ACIM) books [Internet]. 2019 [cited 2019 Jan 31]. Available from: <http://www.aihw.gov.au/acim-books/>
8. Yu XQ, O'Connell DL, Gibberd RW, Armstrong BK. A population-based study from New South Wales, Australia 1996-2001: area variation in survival from colorectal cancer. *Eur J Cancer Oxf Engl* 1990. 2005 Nov;41(17):2715–21.
9. Jong KE, Smith DP, Yu XQ, O'Connell DL, Goldstein D, Armstrong BK. Remoteness of residence and survival from cancer in New South Wales. *Med J Aust*. 2004 Jun 21;180(12):618–22.
10. Yu XQ, O'Connell DL, Gibberd RW, Armstrong BK. Assessing the impact of socio-economic status on cancer survival in New South Wales, Australia 1996-2001. *Cancer Causes Control*. 2008 Dec;19(10):1383–90.
11. Stanbury JF, Baade PD, Yu Y, Yu XQ. Cancer survival in New South Wales, Australia: socioeconomic disparities remain despite overall improvements. *BMC Cancer*. 2016 Feb 1;16.
12. Australian Institute of Health and Welfare. National Bowel Cancer Screening Program: monitoring report 2019. Canberra: AIHW; 2019. Report No.: Cancer series no. 125. Cat. no. CAN 125.
13. Feletto E, Yu XQ, Lew J-B, St John DJB, Jenkins MA, Macrae FA, et al. Trends in colon and rectal cancer incidence in Australia from 1982 to 2014: Analysis of data on over 375,000 cases. *Cancer Epidemiol Biomarkers Prev*. 2019;28(1):83–90.
14. Whiteman DC, Webb PM, Green AC, Neale RE, Fritschi L, Bain CJ, et al. Cancers in Australia in 2010 attributable to modifiable factors: summary and conclusions. *Aust N Z J Public Health*. 2015 Oct 1;39(5):477–84.

15. Lew J-B, St John DJB, Xu X-M, Greuter MJE, Caruana M, Cenin DR, et al. Long-term evaluation of benefits, harms, and cost-effectiveness of the National Bowel Cancer Screening Program in Australia: a modelling study. *Lancet Public Health*. 2017 Jul 1;2(7):e331–40.
16. Velentzis LS, Smith MA, Simms KT, Lew J-B, Hall M, Hughes S, et al. Pathways to a cancer-free future: A protocol for modelled evaluations to maximize the future impact of interventions on cervical cancer in Australia. *Gynecol Oncol*. 2019 Jan 1;152(3):465–71.
17. Kang Y-J, Killen J, Caruana M, Simms K, Taylor N, Frayling IM, et al. The predicted impact and cost-effectiveness of systematic testing of people with incident colorectal cancer for Lynch syndrome. *Med J Aust*. 2019;212(2).
18. Morrow A, Hogden E, Kang Y-J, Steinberg J, Canfell K, Solomon MJ, et al. Comparing theory and non-theory based implementation approaches to improving referral practices in cancer genetics: a cluster randomised trial protocol. *Trials*. 2019 Jun 20;20(1):373.
19. Cancer Council NSW. Policy1 [Internet]. 2019 [cited 2019 Aug 21]. Available from: <http://www.policy1.org/models/bowel>
20. Lew J-B, St John DJB, Macrae FA, Emery JD, Ee HC, Jenkins MA, et al. Benefits, harms and costs of potential age-extensions to the National Bowel Cancer Screening Program in Australia. *Cancer Epidemiol Biomarkers Prev*. 2018;27(12):1450–61.
21. Lew J-B, St John DJB, Macrae FA, Emery JD, Ee HC, Jenkins MA, et al. Evaluation of the benefits, harms and cost-effectiveness of potential alternatives to iFOBT testing for colorectal cancer screening in Australia. *Int J Cancer*. 2018 Jul 15;143(2):269–82.
22. Emerson J, Panzer A, Cohen JT, Chalkidou K, Teerawattananon Y, Sculpher M, et al. Adherence to the iDSI reference case among published cost-per-DALY averted studies. *PLOS ONE*. 2019 May 1;14(5):e0205633.
23. Simms KT, Laprise J-F, Smith MA, Lew J-B, Caruana M, Brisson M, et al. Cost-effectiveness of the next generation nonavalent human papillomavirus vaccine in the context of primary human papillomavirus screening in Australia: a comparative modelling analysis. *Lancet Public Health*. 2016 Dec 1;1(2):e66–75.
24. Lew J-B, Simms KT, Smith MA, Hall M, Kang Y-J, Xu XM, et al. Primary HPV testing versus cytology-based cervical screening in women in Australia vaccinated for HPV and unvaccinated: effectiveness and economic assessment for the National Cervical Screening Program. *Lancet Public Health*. 2017 Feb 1;2(2):e96–107.
25. World Cancer Research Fund / American Institute for Cancer Research. Continuous Update Project Report. Diet, Nutrition, Physical Activity, and Colorectal Cancer. World Cancer Research Fund; 2017.
26. IARC Working Group on the Evaluation of Carcinogenic Risks to Humans. IARC Monographs: Personal habits and indoor combustions. Vol. Volume 100E. A review of human carcinogens. Lyon: International Agency for Research on Cancer; 2012.
27. Lauby-Secretan B, Scocciati C, Loomis D, Grosse Y, Bianchini F, Straif K. Body Fatness and Cancer — Viewpoint of the IARC Working Group. *N Engl J Med*. 2016 Aug 25;375(8):794–8.
28. Australian Institute of Health and Welfare. Risk factors contributing to chronic disease. Canberra: AIHW; 2012. Report No.: Cat No. PHE 157.

- 1  
2  
3 29. Cancer Council Australia Colorectal Cancer Guidelines Working Party. Clinical practice  
4 guidelines for the prevention, early detection and management of colorectal cancer [Internet].  
5 Sydney: Cancer Council Australia; 2017 [cited 2018 Jan 3]. Available from:  
6 [https://wiki.cancer.org.au/australia/Guidelines:Colorectal\\_cancer](https://wiki.cancer.org.au/australia/Guidelines:Colorectal_cancer)  
7  
8  
9 30. Algra AM, Rothwell PM. Effects of regular aspirin on long-term cancer incidence and  
10 metastasis: a systematic comparison of evidence from observational studies versus randomised  
11 trials. *Lancet Oncol*. 2012 May;13(5):518–27.  
12  
13 31. Hullar MAJ, Burnett-Hartman AN, Lampe JW. Gut Microbes, Diet, and Cancer. *Cancer Treat*  
14 *Res*. 2014;159:377–99.  
15  
16 32. Keum N, Giovannucci EL. Epidemiology of Colorectal Cancer. In: Loda M, Mucci L, Mittelstadt  
17 M, Van Hemelrijck M, Cotter M, editors. *Pathology and Epidemiology of Cancer*. Springer, Cham;  
18 2017. p. 391–407.  
19  
20 33. Jenkins MA, Ait Ouakrim D, Boussioutas A, Hopper JL, Ee HC, Emery JD, et al. Revised  
21 Australian national guidelines for colorectal cancer screening: family history. *Med J Aust*. 2018 Oct  
22 29;209(10):455–60.  
23  
24 34. Cancer Council Australia Surveillance Colonoscopy Guidelines Working Party. Clinical  
25 Practice Guidelines for Surveillance Colonoscopy. [Internet]. Sydney: Cancer Council Australia; 2019  
26 [cited 2019 Mar 29]. Available from:  
27 <https://wiki.cancer.org.au/australiawiki/index.php?oldid=200728>  
28  
29  
30 35. Weber MF, Chiew M, Feletto E, Kahn C, Sitas F, Webster L. Cancer Screening among  
31 Immigrants Living in Urban and Regional Australia: Results from the 45 and Up Study. *Int J Environ*  
32 *Res Public Health*. 2014 Aug 14;11(8):8251–66.  
33  
34 36. Weber MF, Banks E, Smith DP, O'Connell D, Sitas F. Cancer screening among migrants in an  
35 Australian cohort; cross-sectional analyses from the 45 and Up Study. *BMC Public Health*. 2009 May  
36 15;9:144.  
37  
38 37. He E, Lew J-B, Egger S, Banks E, Ward RL, Beral V, et al. Factors associated with participation  
39 in colorectal cancer screening in Australia: Results from the 45 and Up Study cohort. *Prev Med*. 2018  
40 Jan;106:185–93.  
41  
42 38. White B, Power E, Ciurej M, Lo SH, Nash K, Ormiston-Smith N. Piloting the Impact of Three  
43 Interventions on Guaiac Faecal Occult Blood Test Uptake within the NHS Bowel Cancer Screening  
44 Programme. *BioMed Res Int*. 2015;928251.  
45  
46 39. Jonah L, Pefoyo AK, Lee A, Hader J, Strasberg S, Kupets R, et al. Evaluation of the effect of an  
47 audit and feedback reporting tool on screening participation: The Primary Care Screening Activity  
48 Report (PCSAR). *Prev Med*. 2017 Mar 1;96:135–43.  
49  
50 40. ACE Bowel Screening Cluster. Interventions to increase bowel screening uptake: Final Report  
51 [Internet]. London: Cancer Research UK; 2017. Available from:  
52 [http://www.cancerresearchuk.org/sites/default/files/interventions\\_to\\_increase\\_bowel\\_screening\\_u](http://www.cancerresearchuk.org/sites/default/files/interventions_to_increase_bowel_screening_uptake_v1.0.pdf)  
53 [ptake\\_v1.0.pdf](http://www.cancerresearchuk.org/sites/default/files/interventions_to_increase_bowel_screening_uptake_v1.0.pdf)  
54  
55  
56 41. Worthington J, Lew J-B, Feletto E, Broun K, Durkin SJ, Wakefield MA, et al. Evaluating health  
57 benefits and cost-effectiveness of a mass-media campaign for improving participation in the  
58 National Bowel Cancer Screening Program in Australia. *Public Health*. 2020;179:90–9.  
59  
60

- 1  
2  
3 42. Durkin SJ, Broun K, Wakefield MA. Mass media campaign impact on overall and subgroup  
4 participation rates in the Australian national bowel cancer screening program: a field experiment.  
5 2019;In Preparation.  
6
- 7 43. Australian Government Department of Health. \$10 million to boost bowel cancer screening  
8 participation [Internet]. Australian Government Department of Health; 2019 [cited 2019 Mar 29].  
9 Available from: [https://www.health.gov.au/ministers/the-hon-greg-hunt-mp/media/10-million-to-](https://www.health.gov.au/ministers/the-hon-greg-hunt-mp/media/10-million-to-boost-bowel-cancer-screening-participation)  
10 [boost-bowel-cancer-screening-participation](https://www.health.gov.au/ministers/the-hon-greg-hunt-mp/media/10-million-to-boost-bowel-cancer-screening-participation)  
11  
12
- 13 44. Aran V, Victorino AP, Thuler LC, Ferreira CG. Colorectal Cancer: Epidemiology, Disease  
14 Mechanisms and Interventions to Reduce Onset and Mortality. *Clin Colorectal Cancer*. 2016  
15 Sep;15(3):195–203.  
16
- 17 45. Young JM, Leong DC, Armstrong K, O’Connell D, Armstrong BK, Spigelman AD, et al.  
18 Concordance with national guidelines for colorectal cancer care in New South Wales: a population-  
19 based patterns of care study. *Med J Aust*. 2007 Mar 19;186(6):292–5.  
20
- 21 46. Kuhry E, Schwenk WF, Gaupset R, Romild U, Bonjer HJ. Long-term results of laparoscopic  
22 colorectal cancer resection. *Cochrane Database Syst Rev*. 2008 Apr 16;(2):CD003432.  
23
- 24 47. Wagner ADADW, Arnold D, Grothey AAG, Haerting J, Unverzagt S. Anti-angiogenic therapies  
25 for metastatic colorectal cancer. *Cochrane Database Syst Rev*. 2009 Jul 8;(3):CD005392.  
26
- 27 48. Australian Government Department of Health. Pharmaceutical Benefits Scheme (PBS) |  
28 Cetuximab, panitumumab and bevacizumab for metastatic colorectal cancer [Internet]. The  
29 Pharmaceutical Benefits Scheme. 2018 [cited 2019 Aug 15]. Available from:  
30 [http://www.pbs.gov.au/info/industry/listing/participants/public-release-docs/2018-02/metastatic-](http://www.pbs.gov.au/info/industry/listing/participants/public-release-docs/2018-02/metastatic-colorectal-cancer-february-2018)  
31 [colorectal-cancer-february-2018](http://www.pbs.gov.au/info/industry/listing/participants/public-release-docs/2018-02/metastatic-colorectal-cancer-february-2018)  
32  
33
- 34 49. Kalyan A, Kircher S, Shah H, Mulcahy M, Benson A. Updates on immunotherapy for  
35 colorectal cancer. *J Gastrointest Oncol*. 2018 Feb;9(1):160–9.  
36
- 37 50. Ooft SN, Weeber F, Dijkstra KK, McLean CM, Kaing S, Werkhoven E van, et al. Patient-derived  
38 organoids can predict response to chemotherapy in metastatic colorectal cancer patients. *Sci Transl*  
39 *Med*. 2019;11(513).  
40
- 41 51. Jorgensen ML, Young JM, Solomon MJ. Optimal delivery of colorectal cancer follow-up care:  
42 improving patient outcomes. *Patient Relat Outcome Meas*. 2015 May 18;6:127–38.  
43
- 44 52. El-Shami K, Oeffinger KC, Erb NL, Willis A, Bretsch JK, Pratt-Chapman ML, et al. American  
45 Cancer Society Colorectal Cancer Survivorship Care Guidelines. *CA Cancer J Clin*. 2015;65(6):427–55.  
46  
47
- 48 53. Young JM, Durcinoska I, DeLoyde K, Solomon MJ. Patterns of follow up and survivorship care  
49 for people with colorectal cancer in new South Wales, Australia: a population-based survey. *BMC*  
50 *Cancer*. 2018 Mar 27;18(1):339.  
51
- 52 54. Drury A, Payne S, Brady A-M. Cancer survivorship: Advancing the concept in the context of  
53 colorectal cancer. *Eur J Oncol Nurs*. 2017 Aug 1;29:135–47.  
54
- 55 55. Worthington J, Lew J-B, Feletto E, Holden CA, Worthley DL, Miller C, et al. Improving  
56 Australian National Bowel Cancer Screening Program outcomes through increased participation and  
57 cost-effective investment. *PLOS ONE*. 2020;15(2):e0227899.  
58  
59  
60

- 1  
2  
3 56. Grogan PB, Olver IN. A bowel cancer screening plan at last. *Med J Aust*. 2014 Oct  
4 20;201(8):435–6.  
5  
6 57. Owen L, Morgan A, Fischer A, Ellis S, Hoy A, Kelly MP. The cost-effectiveness of public health  
7 interventions. *J Public Health Oxf Engl*. 2012 Mar;34(1):37–45.  
8  
9 58. Australian Institute of Health and Welfare. Cancer in Aboriginal & Torres Strait Islander  
10 people of Australia [Internet]. Australian Institute of Health and Welfare. 2018 [cited 2018 May 15].  
11 Available from: [https://www.aihw.gov.au/reports/cancer/cancer-in-indigenous-](https://www.aihw.gov.au/reports/cancer/cancer-in-indigenous-australians/contents/table-of-contents)  
12 [australians/contents/table-of-contents](https://www.aihw.gov.au/reports/cancer/cancer-in-indigenous-australians/contents/table-of-contents)  
13  
14  
15  
16

### 17 **Acknowledgements**

18 Not applicable  
19

### 20 **Author statement**

21  
22 KC conceived Pathways and developed the scope of evaluations with EF, JBL, JW, EH, MC and input  
23 on data interpretation from all SAC members: KBut, HH, NT, EB, KBa, KBr, AB, RC, JC, AD, HE, JE, IMF,  
24 PG, CHold, CHorn, MAJ, JGK, MAL, BL, GM, SM, BP, DJSJ, LT, KT, MW, RLW, AKW, DW, BKA, FAM. EF  
25 authored the manuscript with input from all co-authors: JBL, JW, EH, MC, KBut, HH, NT, EB, KBa, KBr,  
26 AB, RC, JC, AD, HE, JE, IMF, PG, CHold, CHorn, MAJ, JGK, MAL, BL, GM, SM, BP, DJSJ, LT, KT, MW,  
27 RLW, AKW, DW, BKA, FAM and KC. All authors critically reviewed and contributed to the final  
28 manuscript.  
29  
30  
31  
32  
33  
34  
35

### 36 **Funding**

37 This work was supported by Cancer Council New South Wales (CCNSW).  
38  
39  
40

### 41 **Conflicts of Interest**

42 KC, EF, JW, JBL, EH, MC, NT, KB and HH receive salary support from CCNSW. KC is co-PI of unrelated  
43 investigator-initiated trial of cervical screening in Australia ('Compass') conducted by the Victorian  
44 Cytology Service, which has received a funding contribution from Roche Molecular Systems and  
45 Ventana Inc., USA. All other co-authors have no conflicts of interest to disclose.  
46  
47  
48  
49  
50  
51  
52  
53  
54  
55  
56  
57  
58  
59  
60



1  
2  
3  
4  
5  
6  
7  
8  
9  
10  
11  
12  
13  
14  
15  
16  
17  
18  
19  
20  
21  
22  
23  
24  
25  
26  
27  
28  
29  
30  
31  
32  
33  
34  
35  
36  
37  
38  
39  
40  
41  
42  
43  
44  
45  
46  
47  
48  
49  
50  
51  
52  
53  
54  
55  
56  
57  
58  
59  
60

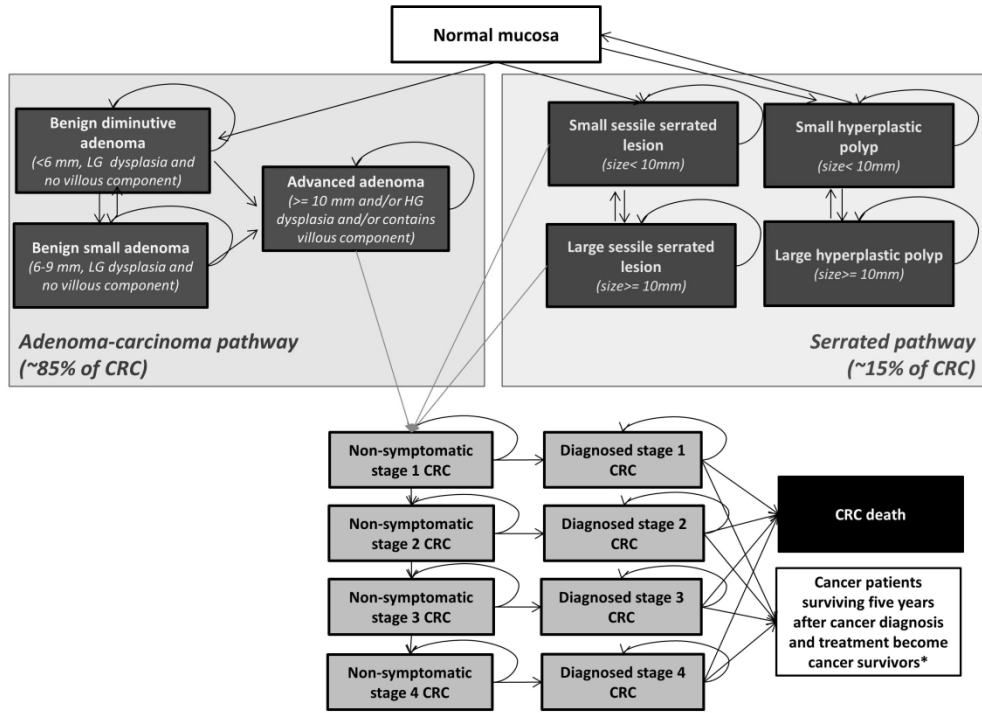

Figure 1: Schematic diagram of the Policy1-Bowel microsimulation model platform.

254x190mm (300 x 300 DPI)

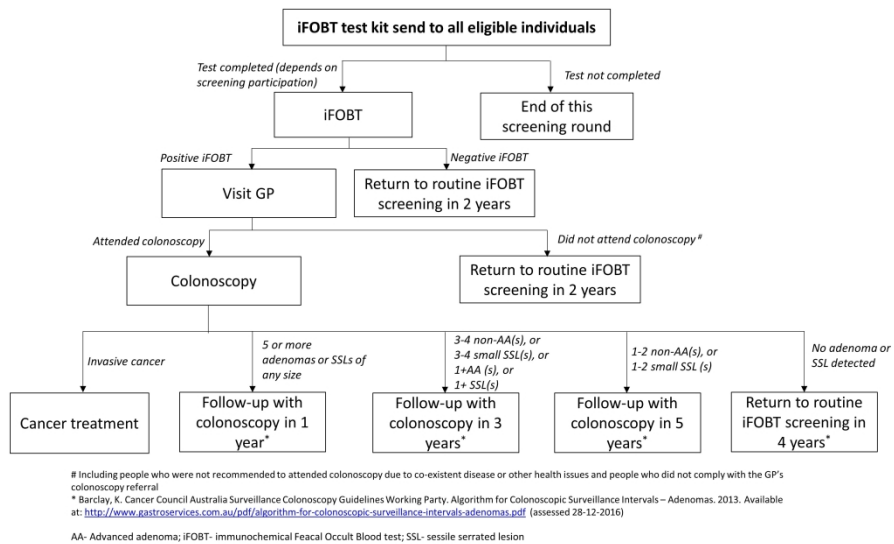

Figure 2: Modelled screening delivery pathway (based on NBCSP) modelled in the Policy1-Bowel microsimulation model platform.

338x190mm (300 x 300 DPI)
